# Supplementary material for: Tetraethylammonium iodide catalyzed synthesis of diaryl ketones via the merger of cleavage of C–C double bonds and recombination of aromatic groups
Source: Royal Society of Chemistry journal article supplement (doi:10.1039/c4ra08764j), 2014-01-01

**Supporting Information for**  
**Tetraethylammonium Iodide Catalyzed Synthesis of Diaryl**  
**Ketones *via* the Merger of Cleavage of C-C Double Bond and**  
**Recombination of Aromatic Groups**

Xianghua Zeng,<sup>a,b</sup> Daqian Xu,<sup>a</sup> Chengxia Miao,<sup>a</sup> Chungu Xia<sup>a</sup> and Wei Sun\*,<sup>a</sup>

<sup>a</sup> State Key Laboratory for Oxo Synthesis and Selective Oxidation, Lanzhou Institute of Chemical Physics, Chinese Academy of Sciences, Lanzhou 730000, China. Fax: +86-931-8277088; Tel: +86-931-4668278; E-mail: [wsun@licp.cas.cn](mailto:wsun@licp.cas.cn)

<sup>b</sup> College of Biological, Chemical Sciences and Engineering, Jiaxing University, Jiaxing 314001, China

**Contents:**

- 1. General Remarks**
- 2. General procedure for the synthesis of ketones from arylalkenes.**
- 3. Oxidative cleavage of various terminal alkenes.**
- 4. Mechanism study with GC-MS and <sup>1</sup>H NMR.**
- 5. NMR Spectra of the products.**

## 1. General Remarks

The  $^1\text{H}$  and  $^{13}\text{C}$  NMR spectra were recorded on a Bruker Avance III 400 MHz spectrometer. The chemical shifts ( $\delta$ ) are reported in ppm and coupling constants ( $J$ ) in Hz. GC-MS was measured on Agilent 7890A /5975C spectrometer with a HP-5-MS column. Column chromatography was generally performed on silica gel (200-300 mesh) and TLC inspections were on silica gel GF<sub>254</sub> plates.

Unless otherwise stated, all commercial reagents and solvents were used as received. Compounds **1b-1v** were synthesized according to the procedure reported in the literature.<sup>1</sup>

## 2. General procedure for the synthesis of ketones from arylalkenes.

The mixture solution of arylalkene (0.2 mmol), tetraethylammonium iodide (1.3 mg, 0.005 mmol), sodium periodate (130 mg, 0.6 mmol), acetonitrile (0.8 mL) and water (0.2 mL) were stirred at 105 °C for 12 h. After the reaction, anhydrous sodium sulfate was added to the above mixture and then the mixture was purified by flash chromatography (PET/EtOAc = 1 : 0 to 10 : 1 ) to give the desired products.

Benzophenone (**2a**)<sup>2</sup>: White solid (33.1 mg, 91%). <sup>1</sup>H NMR (CDCl<sub>3</sub>, 400 MHz)  $\delta$  = 7.80-7.82 (m, 4H), 7.57-7.62 (m, 2H), 7.47-7.51 (m, 4H); <sup>13</sup>C NMR (CDCl<sub>3</sub>, 100 MHz)  $\delta$  = 196.8, 137.6, 132.5, 130.1, 128.3. GC-MS (EI-MS): 182.1

Phenyl(*p*-tolyl)methanone (**2b**)<sup>3</sup>: White solid (37.3 mg, 95%). <sup>1</sup>H NMR (CDCl<sub>3</sub>, 400 MHz)  $\delta$  = 7.74-7.80 (m, 4H), 7.56-7.60 (m, 1H), 7.46-7.49 (m, 2H), 7.28 (d, *J* = 8.0 Hz, 2H), 2.44 (s, 3H); <sup>13</sup>C NMR (CDCl<sub>3</sub>, 100 MHz)  $\delta$  = 196.6, 143.3, 137.9, 134.9, 132.2, 130.4, 129.9, 129.0, 128.3, 21.7. GC-MS (EI-MS): 196.0.

Phenyl(*m*-tolyl)methanone (**2c**)<sup>4</sup>: White solid (36.9 mg, 94%). <sup>1</sup>H NMR (CDCl<sub>3</sub>, 400 MHz)  $\delta$  = 7.72-7.74 (m, 2H), 7.49-7.52 (m, 1H), 7.33-7.40 (m, 2H), 7.30-7.32 (m, 1H), 7.15-7.25 (m, 3H), 2.26 (s, 3H); <sup>13</sup>C NMR (CDCl<sub>3</sub>, 100 MHz)  $\delta$  = 198.7, 138.6, 137.7, 136.8, 133.2, 131.0, 130.3, 130.2, 128.6, 128.5, 125.2, 20.0. GC-MS (EI-MS): 196.0.

Phenyl(*o*-tolyl)methanone (**2d**)<sup>4</sup>: White solid (36.1 mg, 92%). <sup>1</sup>H NMR (CDCl<sub>3</sub>, 400 MHz)  $\delta$  = 7.79-7.81 (m, 2H), 7.57-7.64 (m, 3H), 7.48 (t, *J* = 8.0 Hz, 2H), 7.34-7.42 (m, 2H), 2.42 (s, 3H); <sup>13</sup>C NMR (CDCl<sub>3</sub>, 100 MHz)  $\delta$  = 197.0, 138.2, 137.8, 137.6, 133.2, 132.4, 130.5, 130.1, 128.3, 128.1, 127.4, 21.0.

(4-Chlorophenyl)(phenyl)methanone (**2e**)<sup>3</sup>: White solid (38.9 mg, 90%). <sup>1</sup>H NMR (CDCl<sub>3</sub>, 400 MHz)  $\delta$  = 7.74-7.78 (m, 4H), 7.58-7.63 (m, 1H), 7.45-7.51 (m, 4H); <sup>13</sup>C NMR (CDCl<sub>3</sub>, 100 MHz)  $\delta$  = 195.6, 138.9, 137.2, 135.9, 132.7, 131.5, 129.9, 128.7, 128.4.

(3-Chlorophenyl)(phenyl)methanone (**2f**)<sup>3</sup>: White solid (39.8 mg, 92%). <sup>1</sup>H NMR (CDCl<sub>3</sub>, 400 MHz)  $\delta$  = 7.78-7.80 (m, 3H), 7.66 (dd, *J* = 7.6, 1.2 Hz, 1H), 7.60-7.63 (m, 1H), 7.56-7.57 (m, 1H), 7.49 (t, *J* = 7.6 Hz, 2H), 7.40-7.43 (m, 1H); <sup>13</sup>C NMR (CDCl<sub>3</sub>, 100 MHz)  $\delta$  = 195.3, 139.3, 136.9, 134.6, 132.9, 132.4, 130.1, 129.9, 129.7, 128.5, 128.2.

(2-Chlorophenyl)(phenyl)methanone (**2g**)<sup>3</sup>: White solid (38.5 mg, 89%). <sup>1</sup>H NMR (CDCl<sub>3</sub>, 400

MHz)  $\delta$  = 7.81-7.83 (m, 2H), 7.58-7.63 (m, 1H), 7.45-7.49 (m, 4H), 7.37-7.38 (m, 2H);  $^{13}\text{C}$  NMR (CDCl<sub>3</sub>, 100 MHz)  $\delta$  = 195.4, 138.6, 136.5, 133.8, 131.3, 131.2, 130.1, 130.0, 129.2, 128.7, 126.7.

(2,4-Dichlorophenyl)(phenyl)methanone (**2h**)<sup>5</sup>: White solid (42.6 mg, 85%).  $^1\text{H}$  NMR (CDCl<sub>3</sub>, 400 MHz)  $\delta$  = 7.78-7.81 (m, 2H), 7.60-7.64 (m, 1H), 7.46-7.50 (m, 3H), 7.32-7.36 (m, 2H);  $^{13}\text{C}$  NMR (CDCl<sub>3</sub>, 100 MHz)  $\delta$  = 194.3, 136.9, 136.7, 136.2, 134.0, 132.5, 130.2, 130.1, 128.7, 127.2, 125.7.

(4-Fluorophenyl)(phenyl)methanone (**2i**)<sup>6</sup>: White solid (36.5 mg, 91%).  $^1\text{H}$  NMR (CDCl<sub>3</sub>, 400 MHz)  $\delta$  = 7.83-7.87 (m, 2H), 7.76-7.78 (m, 2H), 7.58-7.62 (m, 1H), 7.47-7.51 (m, 2H), 7.14-7.18 (m, 2H);  $^{13}\text{C}$  NMR (CDCl<sub>3</sub>, 100 MHz)  $\delta$  = 195.3, 165.3 (d,  $J$  = 253 Hz), 137.5, 133.7 (d,  $J$  = 3 Hz), 132.6 (d,  $J$  = 9 Hz), 132.5, 129.9, 128.4, 115.4 (d,  $J$  = 22 Hz).

(4-Bromophenyl)(phenyl)methanone (**2j**)<sup>7</sup>: White solid (47.0 mg, 81%).  $^1\text{H}$  NMR (CDCl<sub>3</sub>, 400 MHz)  $\delta$  = 7.78-7.81 (m, 2H), 7.69-7.71 (m, 2H), 7.62-7.66 (m, 3H), 7.49-7.53 (m, 2H);  $^{13}\text{C}$  NMR (CDCl<sub>3</sub>, 100 MHz)  $\delta$  = 194.6, 136.1, 135.3, 131.7, 130.6, 130.5, 128.9, 127.4, 126.5.

Phenyl(4-(trifluoromethyl)phenyl)methanone (**2k**)<sup>8</sup>: White solid (46.1 mg, 92%).  $^1\text{H}$  NMR (CDCl<sub>3</sub>, 400 MHz)  $\delta$  = 7.89 (d,  $J$  = 8.0 Hz, 2H), 7.80-7.82 (m, 2H), 7.75 (d,  $J$  = 8.0 Hz, 2H), 7.62-7.65 (m, 1H), 7.49-7.53 (m, 2H);  $^{13}\text{C}$  NMR (CDCl<sub>3</sub>, 100 MHz)  $\delta$  = 195.6, 140.7, 136.7, 133.7 (d,  $J$  = 33 Hz), 133.1, 130.2, 130.1, 128.6, 125.4 (d,  $J$  = 11 Hz), 125.3 (d,  $J$  = 4 Hz).

(4-Methoxyphenyl)(phenyl)methanone (**2l**)<sup>9</sup>: White solid (38.6 mg, 91%).  $^1\text{H}$  NMR (CDCl<sub>3</sub>, 400 MHz)  $\delta$  = 7.81-7.84 (m, 2H), 7.40-7.46 (m, 2H), 7.54-7.58 (m, 1H), 7.45-7.48 (m, 2H), 6.94-6.97 (m, 2H), 3.88 (s, 3H);  $^{13}\text{C}$  NMR (CDCl<sub>3</sub>, 100 MHz)  $\delta$  = 195.6, 163.2, 138.3, 132.6, 131.9, 130.1, 129.8, 128.2, 113.6, 55.5.

Benzo[*d*][1,3]dioxol-5-yl(phenyl)methanone (**2m**)<sup>10</sup>: White solid (43.6 mg, 96%).  $^1\text{H}$  NMR (CDCl<sub>3</sub>, 400 MHz)  $\delta$  = 7.73-7.75 (m, 2H), 7.54-7.58 (m, 1H), 7.44-7.48 (m, 2H), 7.36-7.38 (m, 2H), 6.84-6.87 (m, 1H), 6.06 (s, 2H);  $^{13}\text{C}$  NMR (CDCl<sub>3</sub>, 100 MHz)  $\delta$  = 195.2, 151.5, 148.0, 138.1, 132.0, 131.9, 129.7, 128.3, 126.9, 109.9, 107.7, 101.9.

Naphthalen-1-yl(phenyl)methanone (**2n**)<sup>3</sup>: White solid (49.3 mg, 94%).  $^1\text{H}$  NMR (CDCl<sub>3</sub>, 400 MHz)  $\delta$  = 8.10-8.12 (m, 1H), 8.01 (d,  $J$  = 8.0 Hz, 1H), 7.92-7.94 (m, 1H), 7.87-7.89 (m, 2H), 7.58-7.63 (m, 2H), 7.45-7.56 (m, 5H);  $^{13}\text{C}$  NMR (CDCl<sub>3</sub>, 100 MHz)  $\delta$  = 198.1, 138.3, 136.4, 133.7, 133.3, 131.0, 130.5, 128.5, 128.4, 127.8, 127.3, 126.5, 125.7, 124.4.

Phenyl(thiophen-2-yl)methanone (**2o**)<sup>11</sup>: Yellow oil (24.6 mg, 65%).  $^1\text{H}$  NMR (CDCl<sub>3</sub>, 400 MHz)

$\delta = 7.85\text{-}7.88$  (m, 2H), 7.82 (dd,  $J = 8.4, 1.2$  Hz, 1H), 7.72-7.73 (m, 1H), 7.65 (dd,  $J = 4.0, 1.2$  Hz, 1H), 7.49-7.52 (m, 2H), 7.16 (dd,  $J = 4.8, 4.0$  Hz, 1H);  $^{13}\text{C}$  NMR ( $\text{CDCl}_3$ , 100 MHz)  $\delta = 188.3, 143.7, 138.0, 134.9, 134.3, 132.3, 129.2, 128.5, 128.0$ .

(3-Methoxyphenyl)(thiophen-2-yl)methanone (**2p**)<sup>12</sup>: Yellow oil (32.0 mg, 73%).  $^1\text{H}$  NMR ( $\text{CDCl}_3$ , 400 MHz)  $\delta = 7.72$  (dd,  $J = 4.8, 1.2$  Hz, 1H), 7.67 (dd,  $J = 3.6, 1.2$  Hz, 1H), 7.38-7.41 (m, 3H), 7.12-7.17 (m, 2H), 3.87 (s, 3H);  $^{13}\text{C}$  NMR ( $\text{CDCl}_3$ , 100 MHz)  $\delta = 188.0, 159.6, 143.6, 135.6, 134.9, 134.3, 129.4, 128.0, 121.8, 118.6, 113.8, 55.5$ .

(4-Chlorophenyl)(*p*-tolyl)methanone (**2q**)<sup>13</sup>: White solid (42.8 mg, 93%).  $^1\text{H}$  NMR ( $\text{CDCl}_3$ , 400 MHz)  $\delta = 7.72\text{-}7.74$  (m, 2H), 7.69 (d,  $J = 8.0$  Hz, 2H), 7.44-7.50 (m, 2H), 7.29 (d,  $J = 7.6$  Hz, 2H), 2.44 (s, 3H);  $^{13}\text{C}$  NMR ( $\text{CDCl}_3$ , 100 MHz)  $\delta = 195.3, 143.6, 138.6, 136.2, 134.5, 131.2, 130.2, 129.1, 128.5, 21.7$ .

(4-Chlorophenyl)(*m*-tolyl)methanone (**2r**)<sup>13</sup>: White solid (41.4 mg, 90%).  $^1\text{H}$  NMR ( $\text{CDCl}_3$ , 400 MHz)  $\delta = 7.34\text{-}7.77$  (m, 2H), 7.60 (s, 1H), 7.54 (d,  $J = 7.6$  Hz, 1H), 7.45-7.47 (m, 2H), 7.35-7.40 (m, 2H), 2.42 (s, 3H);  $^{13}\text{C}$  NMR ( $\text{CDCl}_3$ , 100 MHz)  $\delta = 195.8, 138.8, 138.4, 137.3, 136.0, 133.5, 131.5, 130.4, 128.6, 128.2, 127.2, 21.4$ .

(4-Chlorophenyl)(*o*-tolyl)methanone (**2s**)<sup>13</sup>: White solid (42.8 mg, 93%).  $^1\text{H}$  NMR ( $\text{CDCl}_3$ , 400 MHz)  $\delta = 7.66$  (d,  $J = 8.8$  Hz, 2H), 7.30-7.36 (m, 3H), 7.17-7.22 (m, 3H), 2.25 (s, 3H);  $^{13}\text{C}$  NMR ( $\text{CDCl}_3$ , 100 MHz)  $\delta = 197.4, 139.7, 138.1, 136.8, 136.1, 131.5, 131.2, 130.6, 128.8, 128.5, 125.3, 20.0$ .

(4-Chlorophenyl)(4-fluorophenyl)methanone(**2t**)<sup>13</sup>: White solid (44.5 mg, 95%).  $^1\text{H}$  NMR ( $\text{CDCl}_3$ , 400 MHz)  $\delta = 7.82$  (dd,  $J = 8.4, 5.6$  Hz, 2H), 7.72 (d,  $J = 8.4$  Hz, 2H), 7.46-7.48 (m, 2H), 7.15-7.19 (m, 2H);  $^{13}\text{C}$  NMR ( $\text{CDCl}_3$ , 100 MHz)  $\delta = 194.1, 165.4$ (d,  $J = 253$  Hz), 139.0, 135.8, 133.4 (d,  $J = 3$  Hz), 132.5 (d,  $J = 10$  Hz), 131.3, 128.7, 115.6(d,  $J = 21$  Hz).

(3-Chlorophenyl)(4-chlorophenyl)methanone (**2u**)<sup>14</sup>: White solid (44.6 mg, 89%).  $^1\text{H}$  NMR ( $\text{CDCl}_3$ , 400 MHz)  $\delta = 7.73\text{-}7.76$  (m, 3H), 7.63 (dt,  $J = 7.6, 1.2$  Hz, 1H), 7.56-7.59 (m, 1H), 7.42-7.50 (m, 3H);  $^{13}\text{C}$  NMR ( $\text{CDCl}_3$ , 100 MHz)  $\delta = 193.0, 138.4, 137.8, 134.2, 133.7, 131.6, 130.4, 128.8, 128.7, 127.8, 126.9$ .

Acetophenone (**2z**)<sup>7</sup>: colorless oil (20.4 mg, 85%).  $^1\text{H}$  NMR ( $\text{CDCl}_3$ , 400 MHz)  $\delta = 7.95\text{-}7.96$  (m, 2H), 7.54-7.58 (m, 1H), 7.44-7.48 (m, 2H), 2.60 (s, 3H);  $^{13}\text{C}$  NMR ( $\text{CDCl}_3$ , 100 MHz)  $\delta = 198.2, 137.1, 133.1, 128.6, 128.3, 26.7$ .

## References

1. S. Chen, Z. Liu, E. Shi, L. Chen, W. Wei, H. Li, Y. Cheng and X. Wan, *Org. Lett.*, 2011, **13**, 2274-2277.
2. M. O'Brien, I. R. Baxendale and S. V. Ley, *Org. Lett.*, 2010, **12**, 1596-1598.
3. B. Xin, Y. Zhang and K. Cheng, *J. Org. Chem.*, 2006, **71**, 5725-5731.
4. D. Wang and Z. Zhang, *Org. Lett.*, 2003, **5**, 4645-4648.
5. M. S. Gowda, S. S. Pande, R. A. Ramakrishna and K. R. Prabhu, *Org. Biomol. Chem.*, 2011, **9**, 5365-5368.
6. P. Tang, W. Wang and T. Ritter, *J. Am. Chem. Soc.*, 2011, **133**, 11482-11484.
7. D. Xing, B. Guan, G. Cai, Z. Fang, L. Yang and Z. Shi, *Org. Lett.*, 2006, **8**, 693-696.
8. A. T. Biju and F. Glorius, *Angew. Chem. Int. Ed.*, 2010, **49**, 9761-9764.
9. M. Cai, J. Peng, W. Hao and G. Ding, *Green Chem.*, 2011, **13**, 190-196.
10. K. Ekoue-Kovi, H. Xu and C. Wolf, *Tetrahedron Lett.*, 2008, **49**, 5773-5776.
11. H. Li, M. Yang, Y. Qi and J. Xue, *Eur. J. Org. Chem.*, 2011, 2662-2667.
12. K. O. Jeon, J. H. Jun, J. S. Yu and C. K. Lee, *J. Heterocyclic Chem.*, 2003, **40**, 763-772.
13. S. Ushijima, S. Dohi, K. Moriyama and H. Togo, *Tetrahedron*, 2012, **68**, 436-1442.
14. J. R. Schmink and S. W. Krska, *J. Am. Chem. Soc.*, 2011, **133**, 19574-19577.

### 3. Oxidative cleavage of various terminal alkenes.

**Table S1** Oxidative cleavage of various terminal olefins<sup>a</sup>

| Entry | Substrate                                                                                    | Product   | Yield(%) <sup>b</sup> |
|-------|----------------------------------------------------------------------------------------------|-----------|-----------------------|
| 1     | <b>1x:</b>  | <b>2x</b> | 87                    |
| 2     | <b>1y:</b>  | <b>2a</b> | 78                    |
| 3     | <b>1z:</b>  | <b>2z</b> | 85                    |

<sup>a</sup> Reaction conditions: Unless otherwise noted, **1** (0.2 mmol), Et<sub>4</sub>Ni (2.5 mol%), NaIO<sub>4</sub> (0.6 mmol, 3 equiv), MeCN (0.8 mL) and H<sub>2</sub>O (0.2 mL) were stirred at 105 °C for 12 h.

<sup>b</sup> Isolated yield.

#### 4. Mechanism study with GC-MS and $^1\text{H}$ NMR.

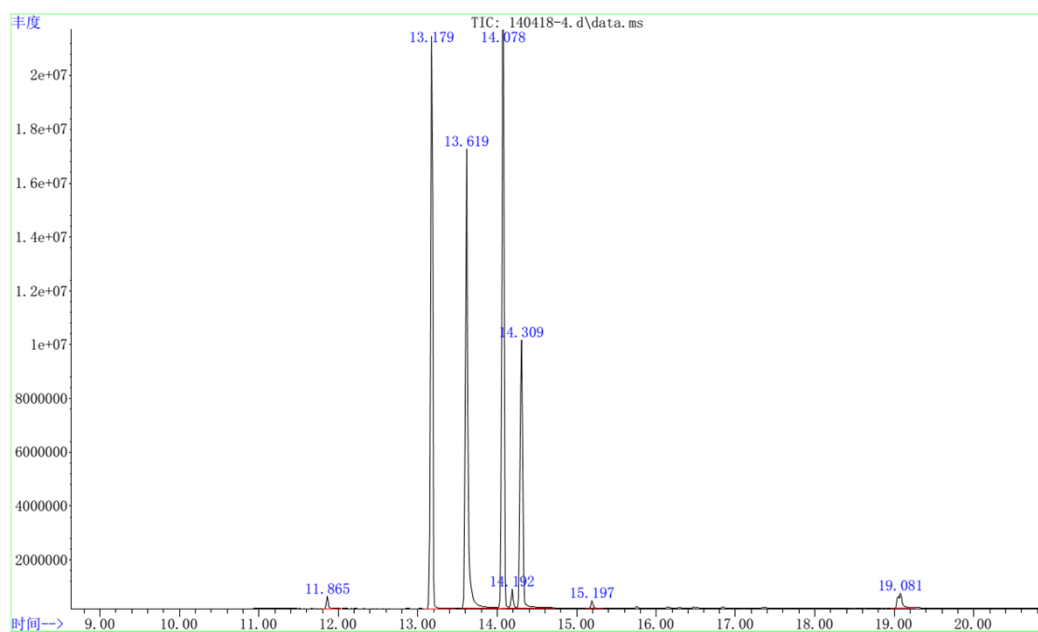

**Figure S1.** GC-MS spectrum of the reaction of *trans*-stilbene under the standard conditions for 2 h (13.179 min, benzophenone; 13.619 min, 2,2-diphenylacetaldehyde; 14.078 min, *trans*-stilbene; 14.192 min, *trans*-stilbene oxide; 14.309 min, 2-phenylacetophenone ).

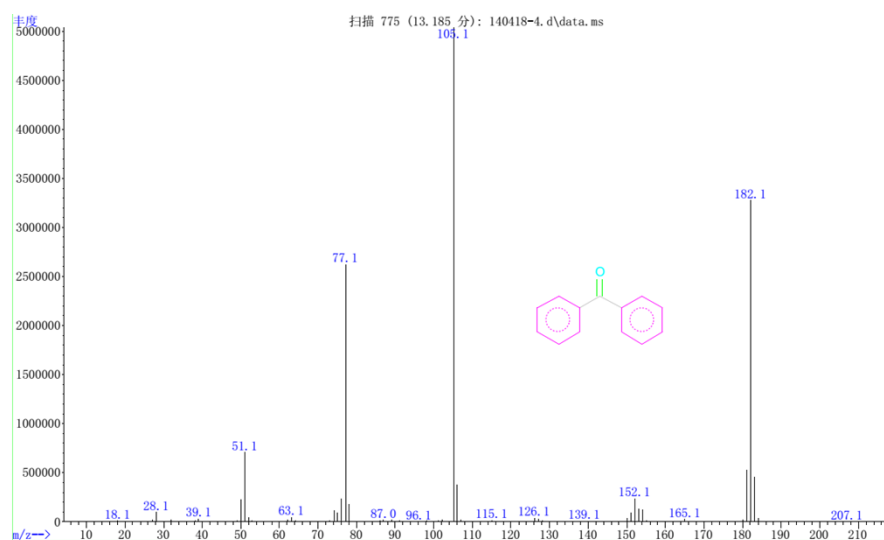

**Figure S2.** MS spectrum of species in 13.179 min (benzophenone).



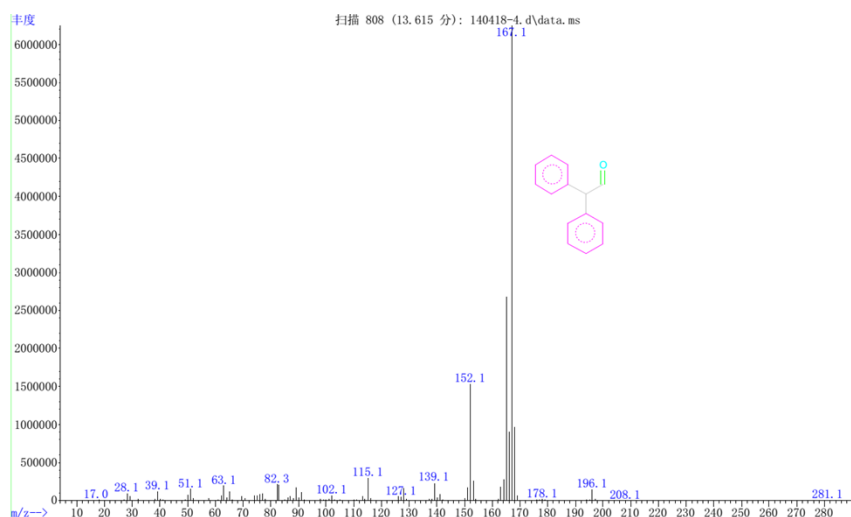

**Figure S3.** MS spectrum of species in 13.619 min (2,2-diphenylacetaldehyde).

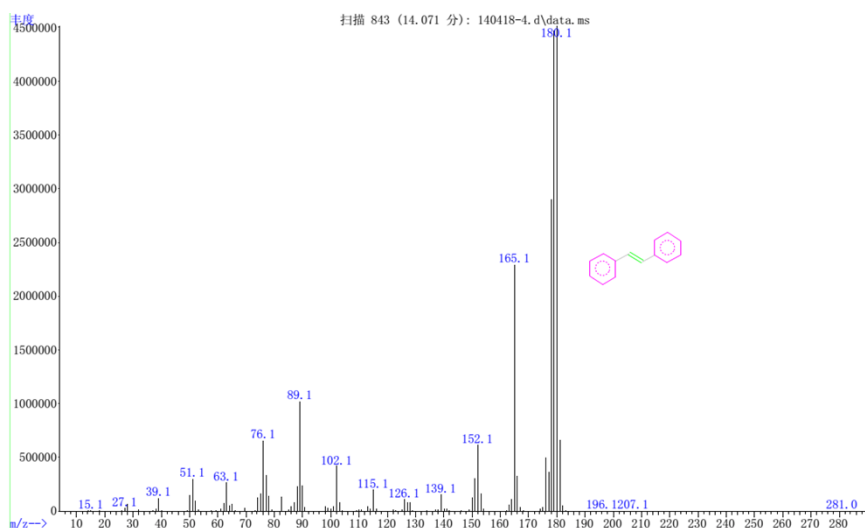

**Figure S4.** MS spectrum of species in 14.078 min (*trans*-stilbene).

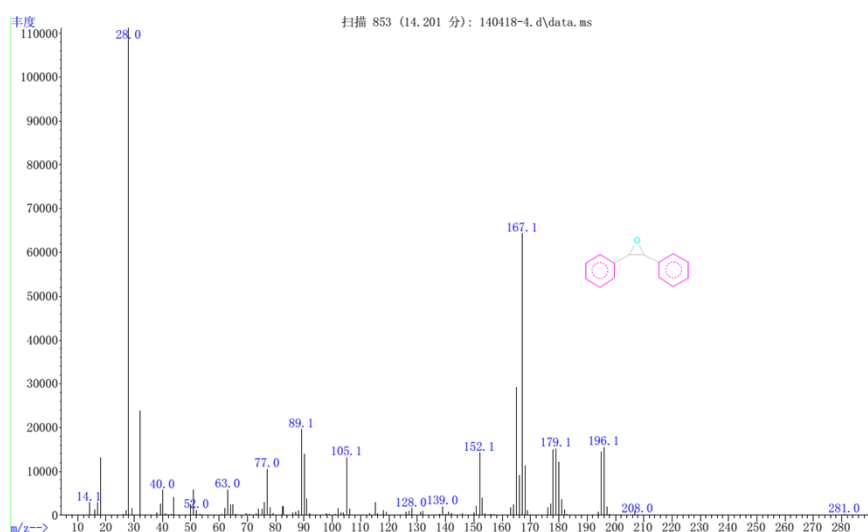

**Figure S5.** MS spectrum of species in 14.192 min (*trans*-stilbene oxide).

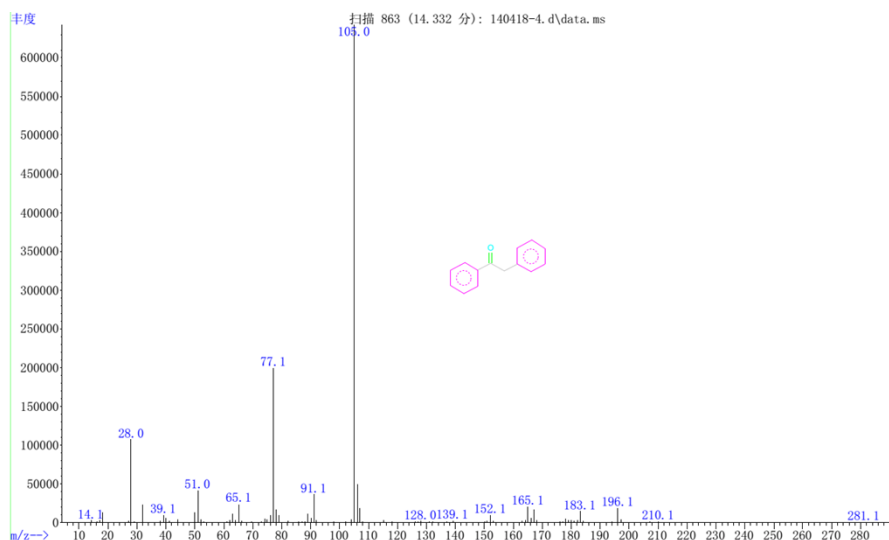

**Figure S6.** MS spectrum of species in 14.309 min (2-phenylacetophenone).

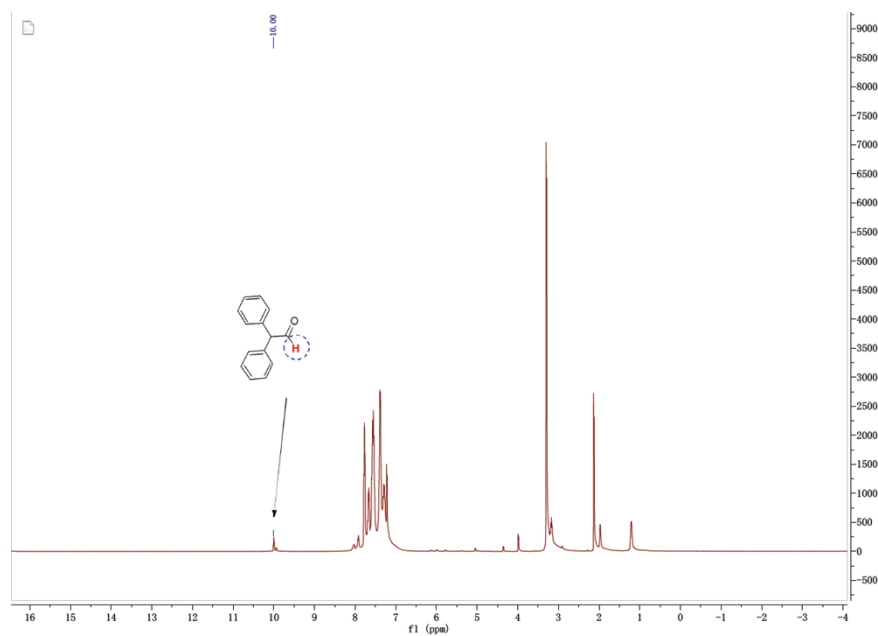

**Figure S7.** **1a** (0.2 mmol), Et<sub>4</sub>Ni (0.005 mmol, 2.5 mol%), NaIO<sub>4</sub> (0.6 mmol, 3 equiv.), CD<sub>3</sub>CN (0.8 mL) and D<sub>2</sub>O (0.2 mL) were stirred at 105 °C (oil bath temperature) for 2 h in a sealed tube and then examination of the <sup>1</sup>H NMR.

## 5. NMR spectra of the products

2a

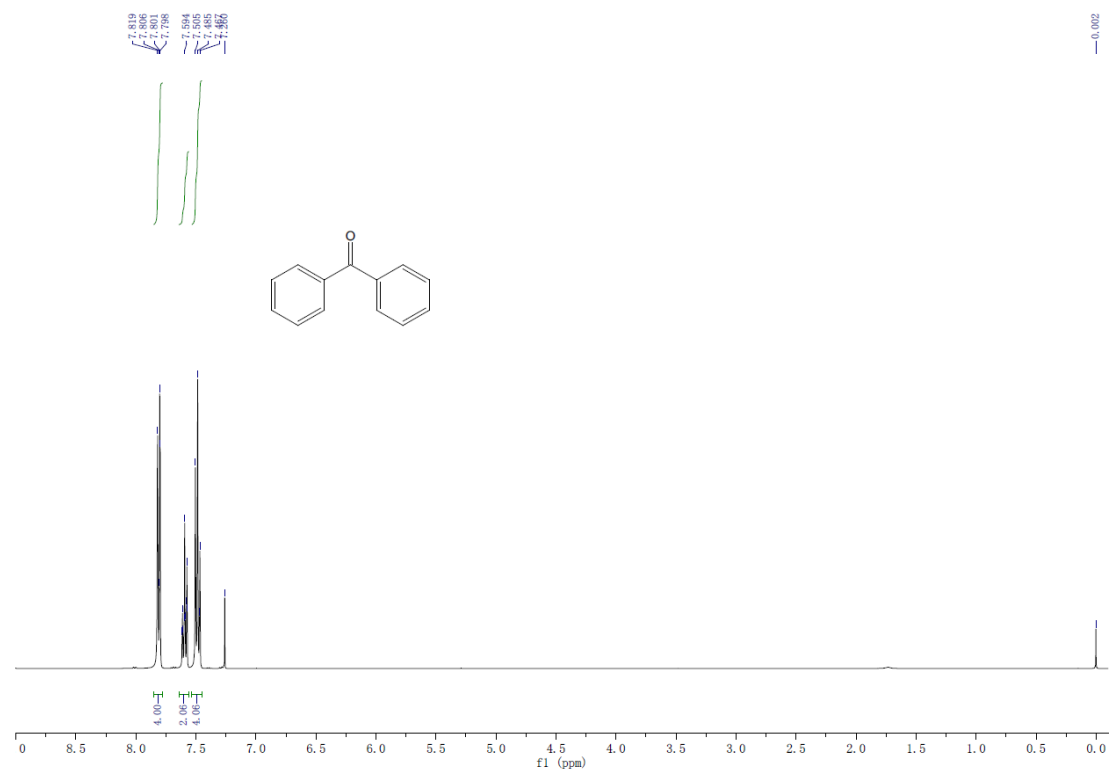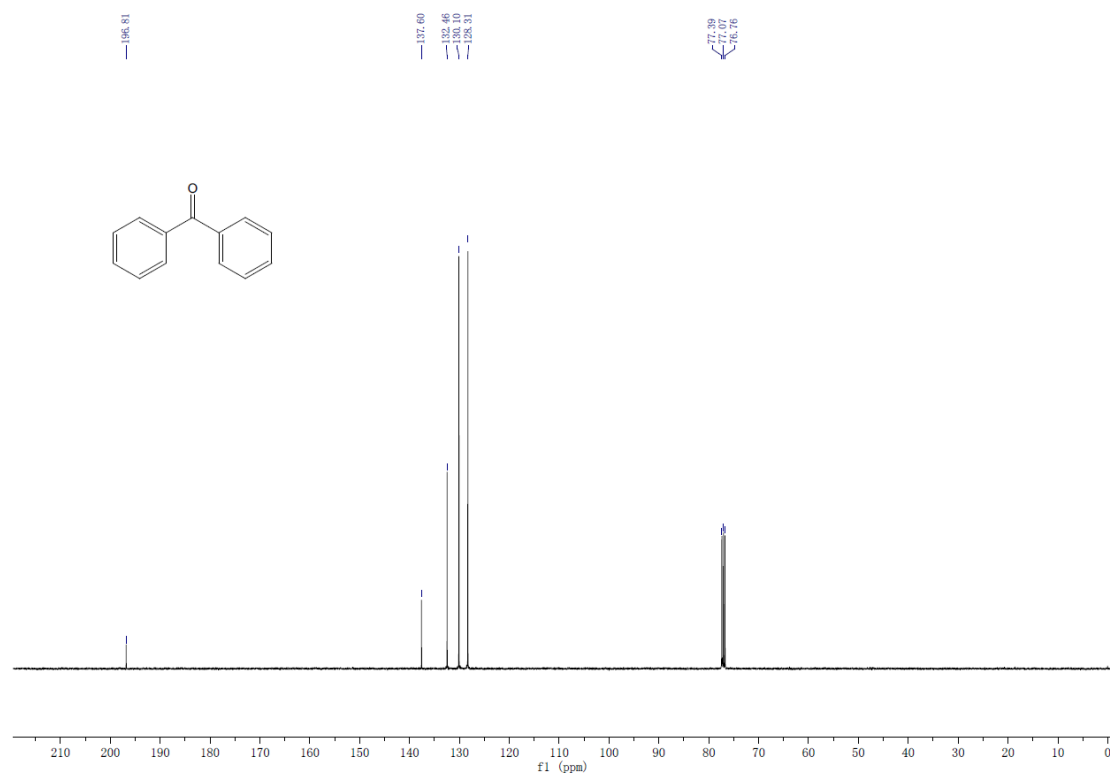

2b

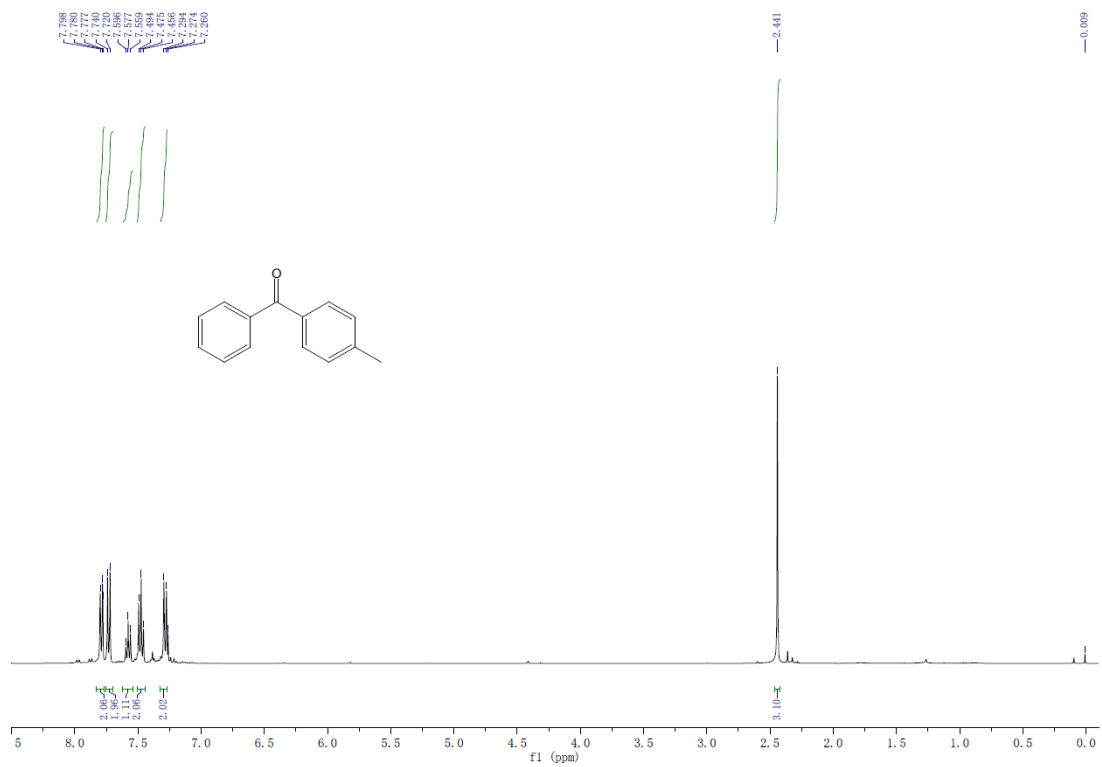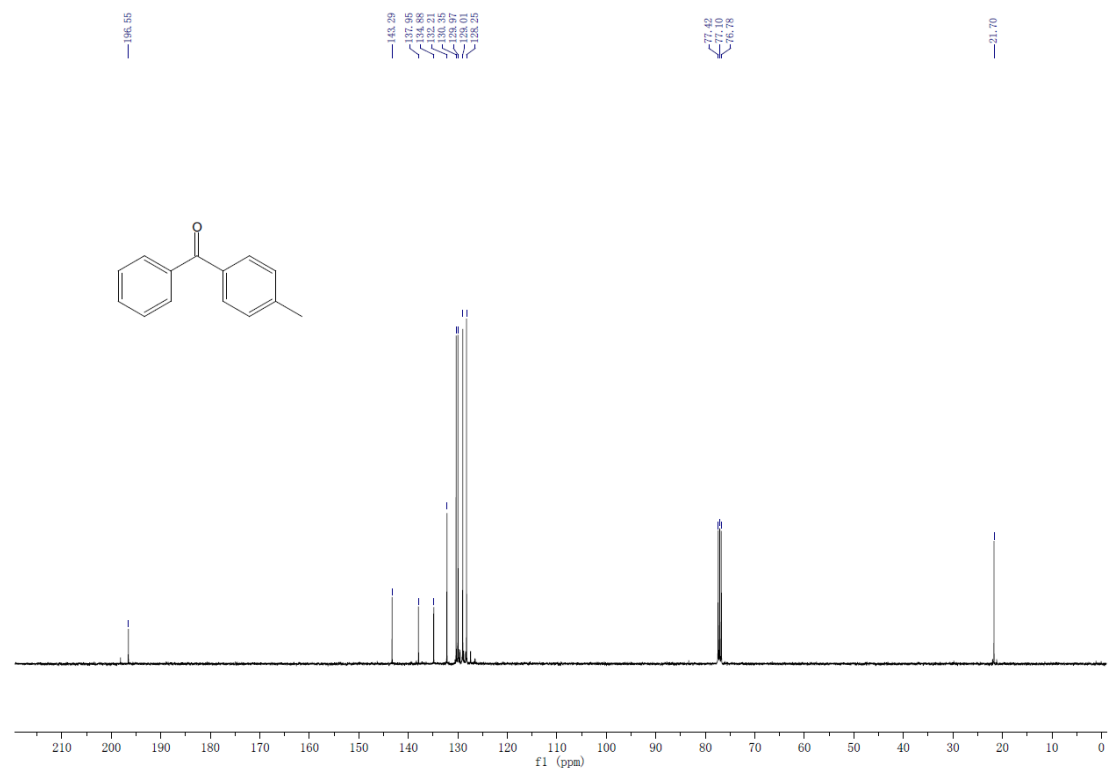

2c

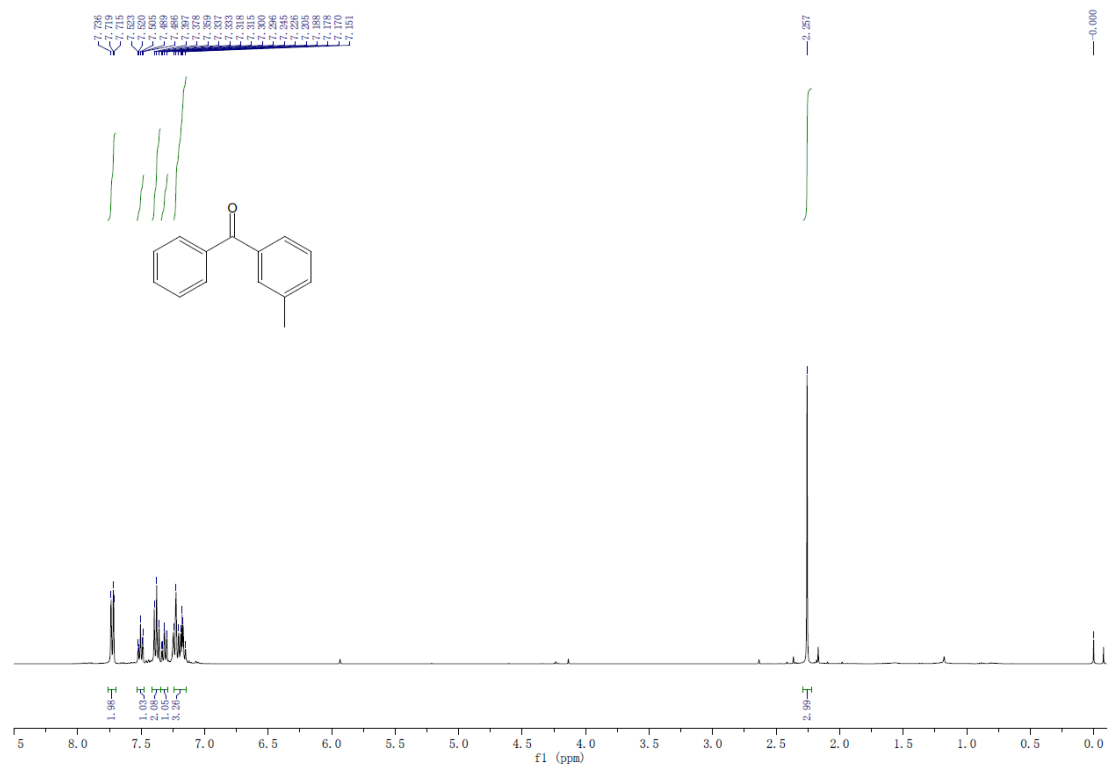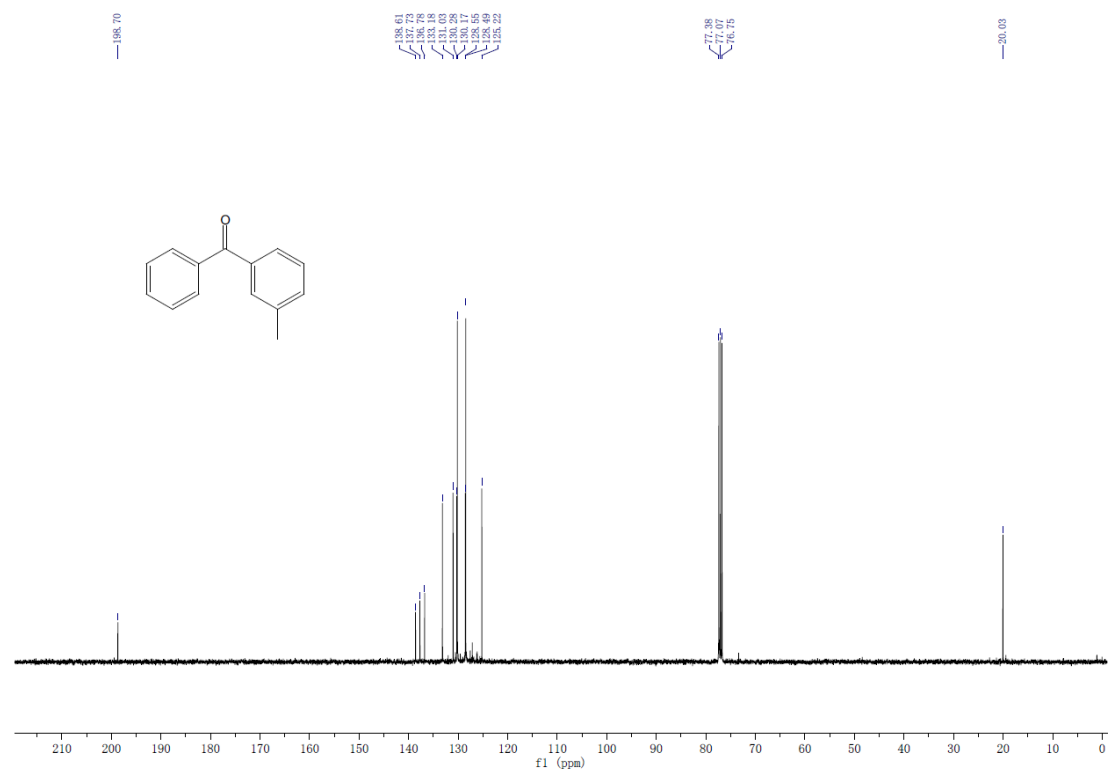

2d

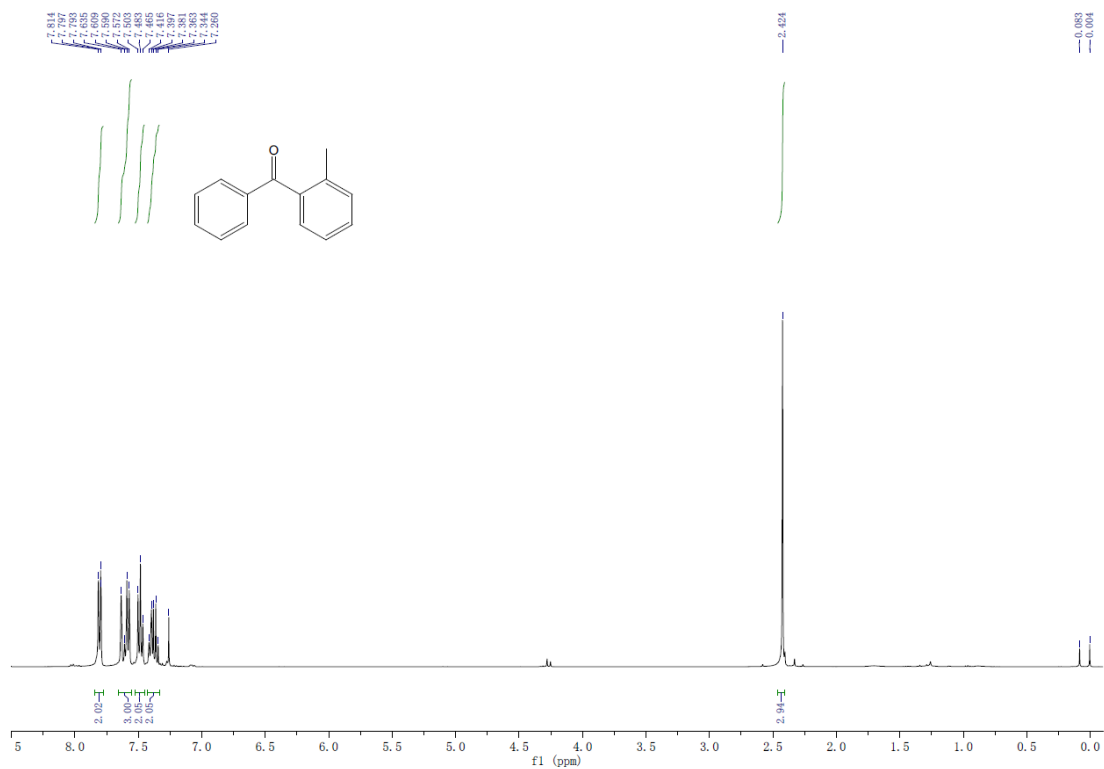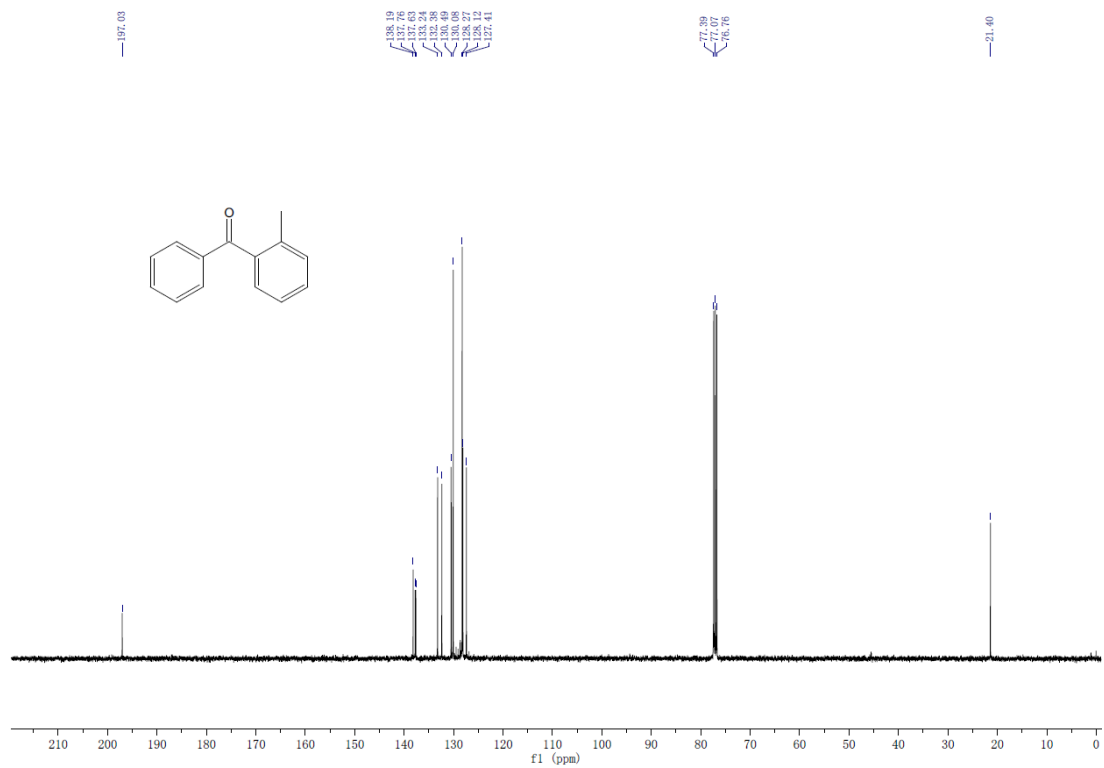

2e

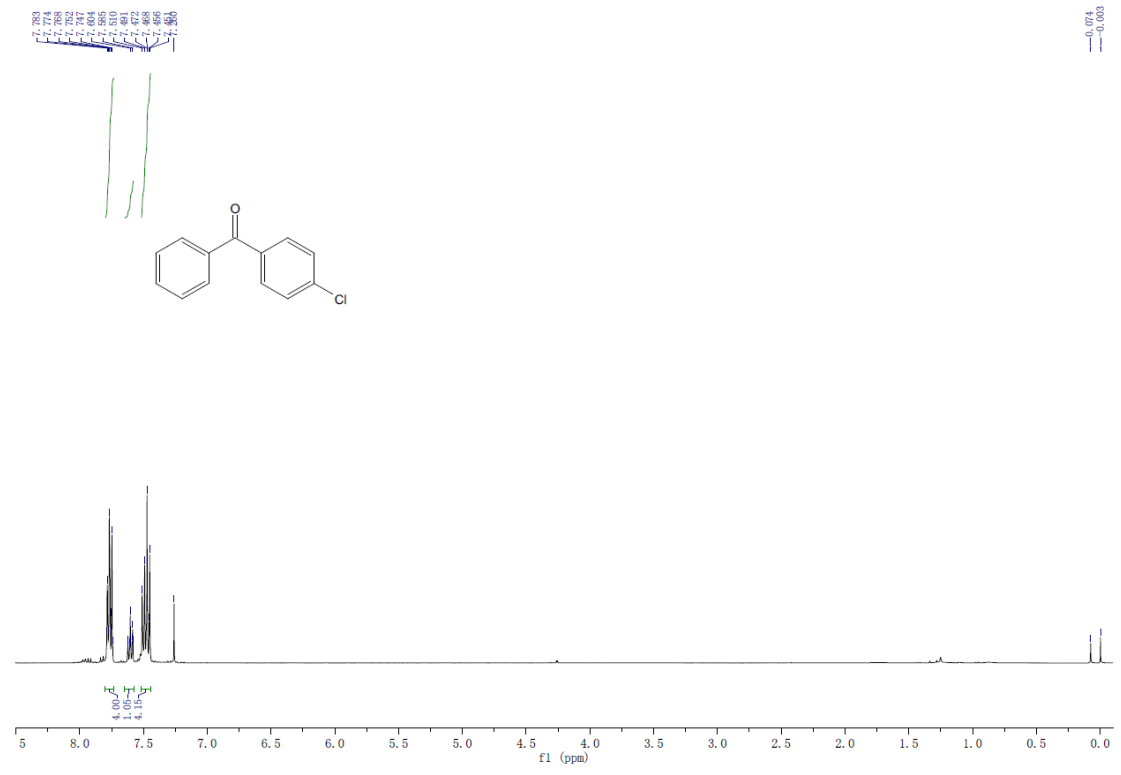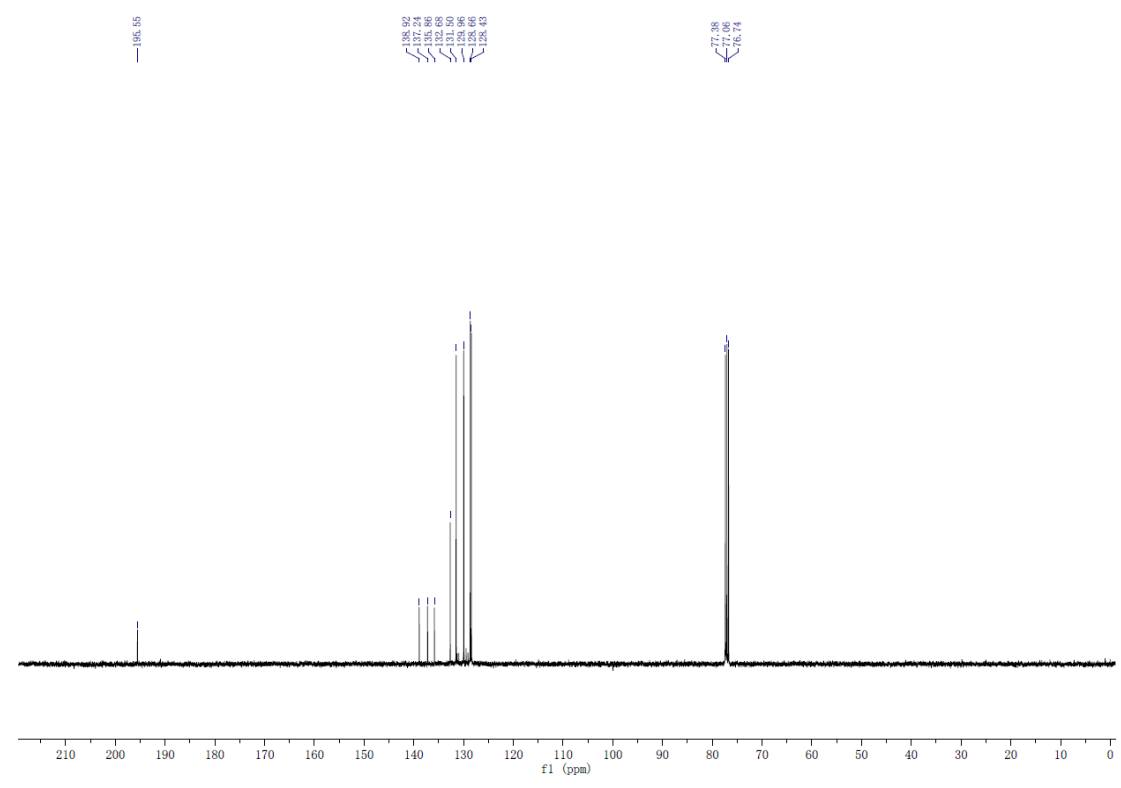

2f

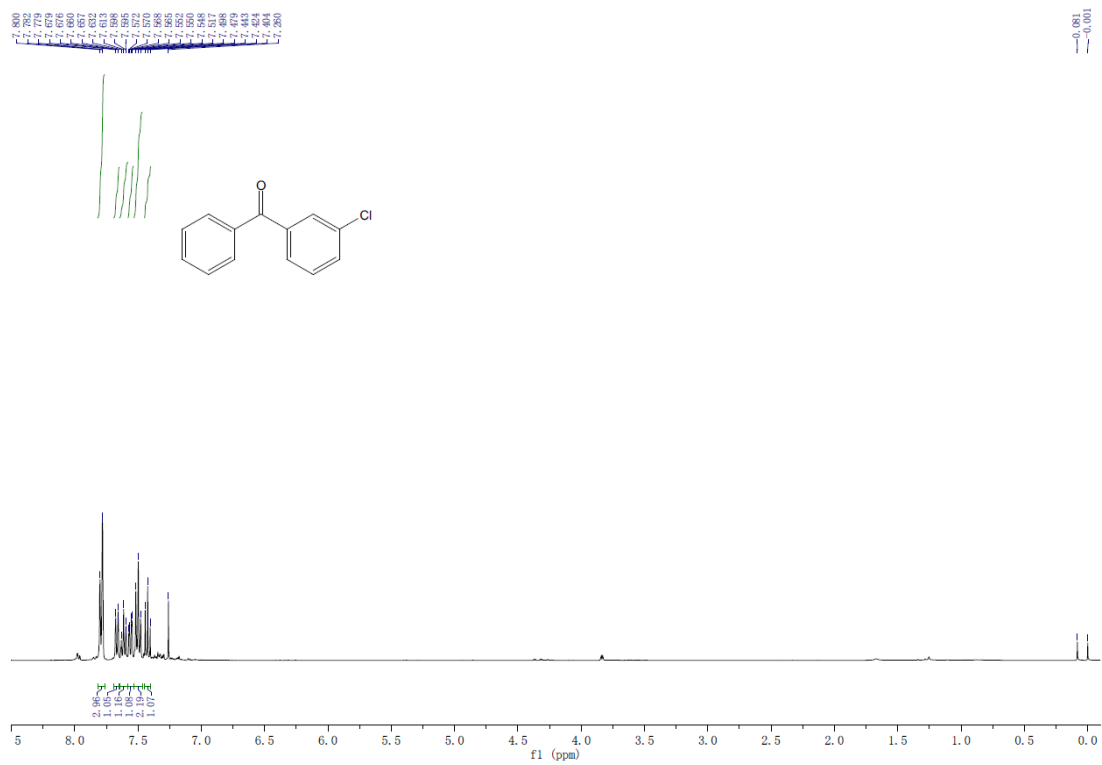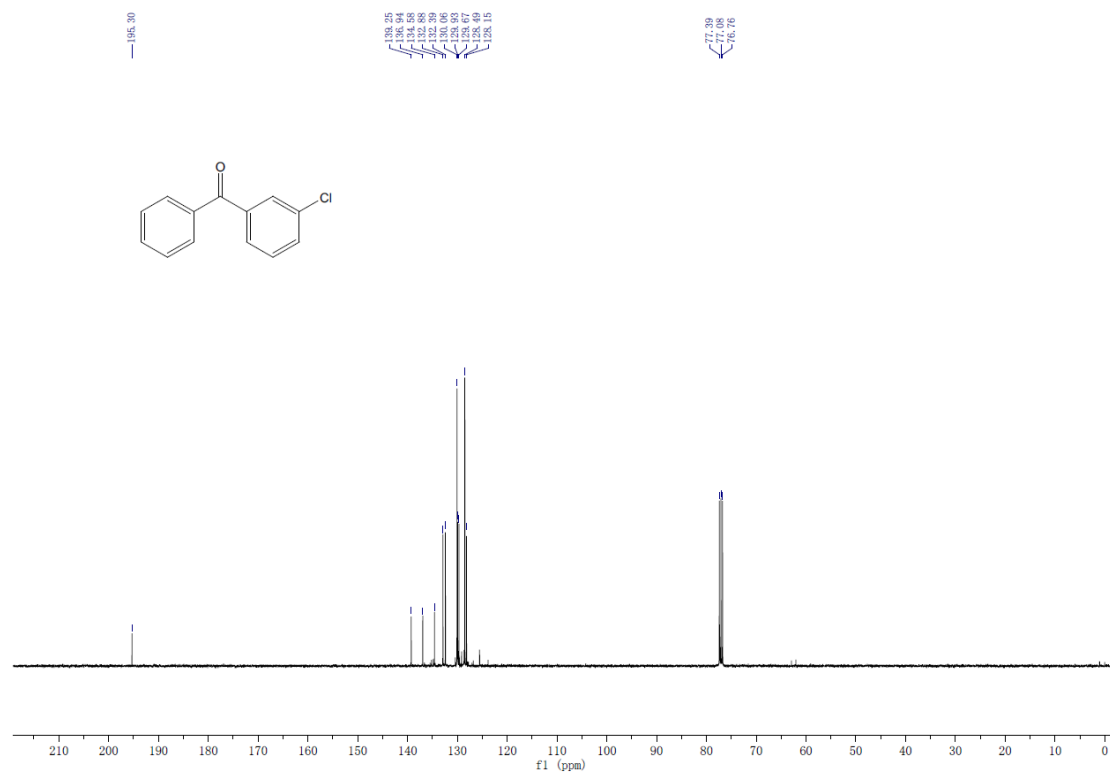



2g

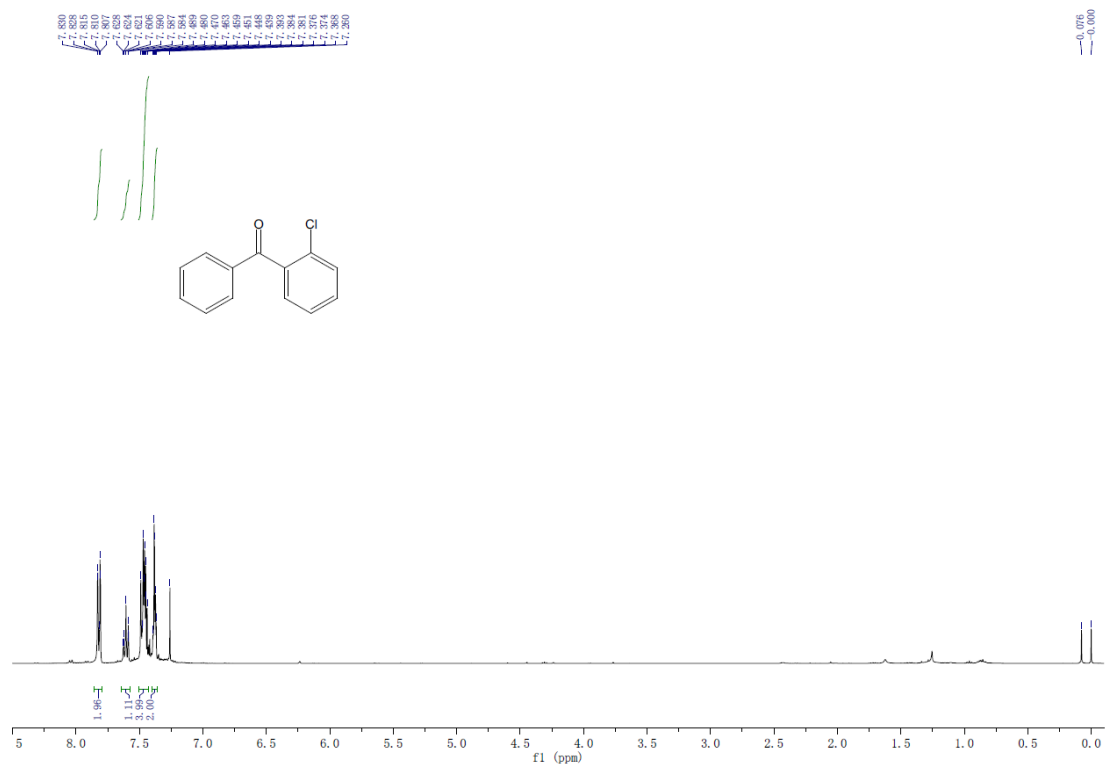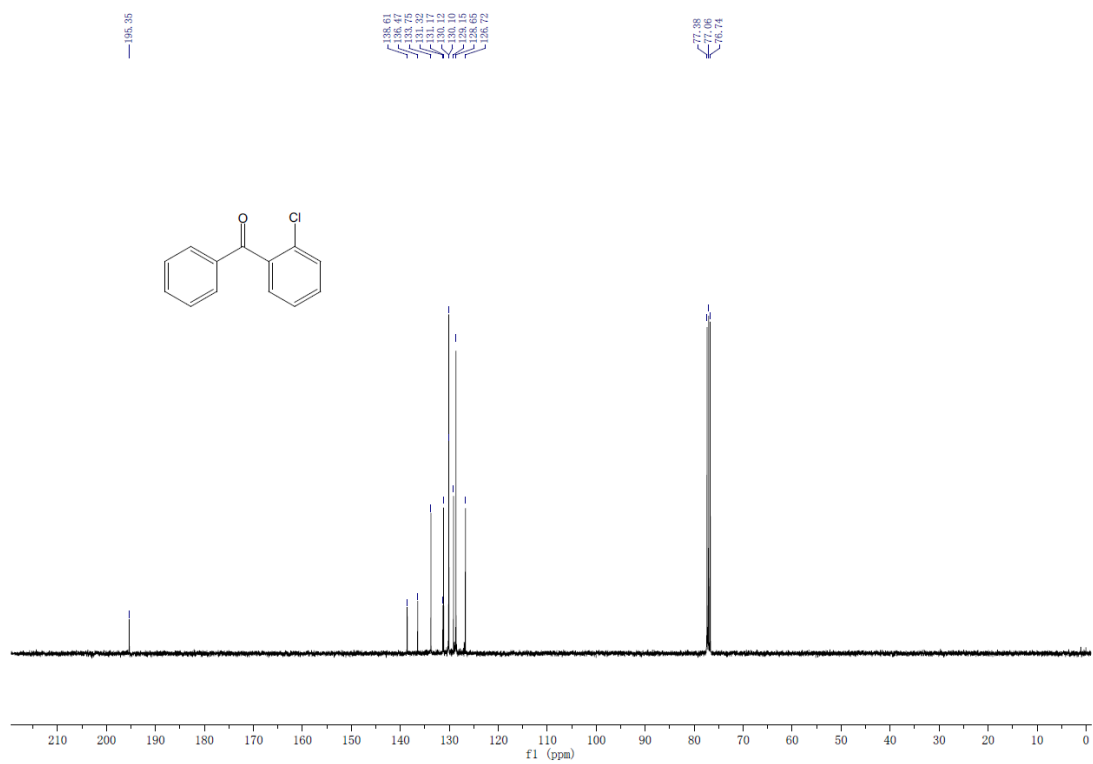

2h

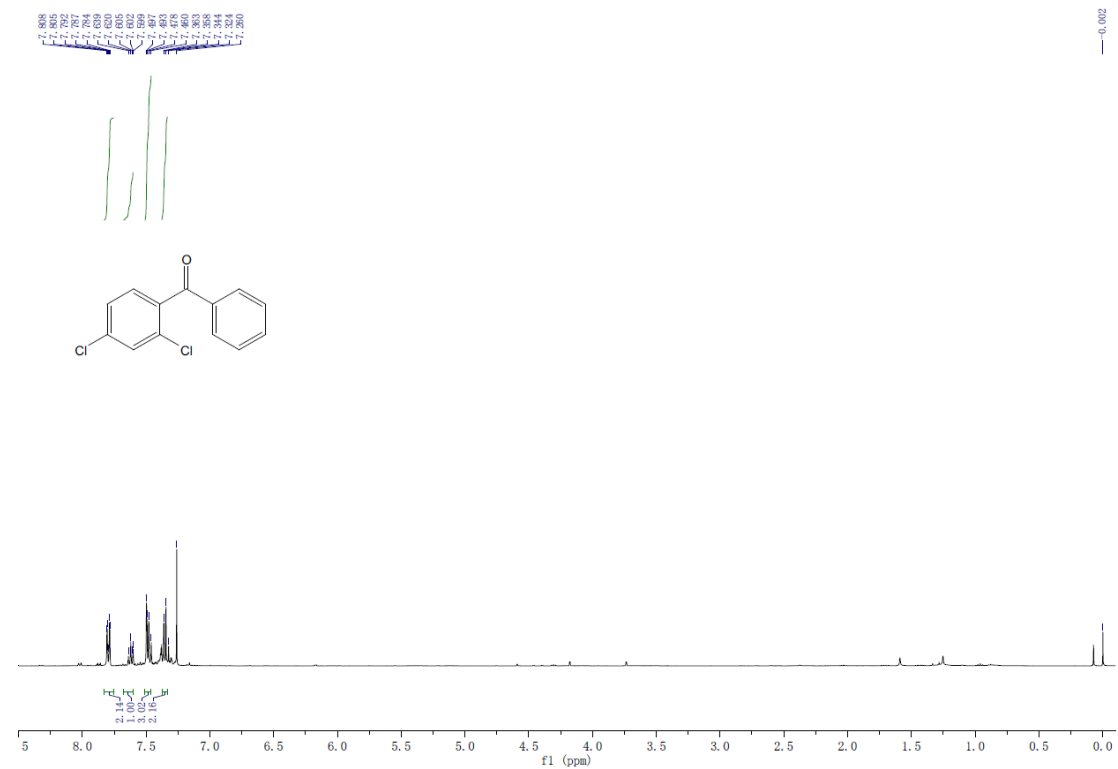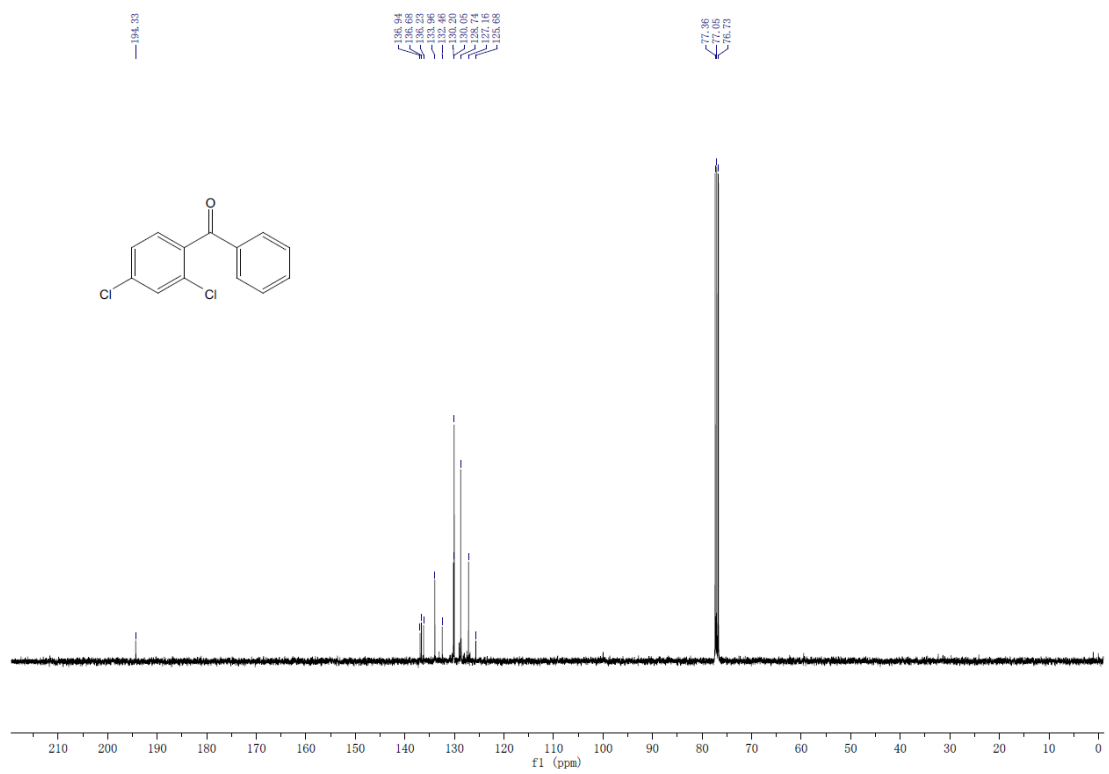

2i

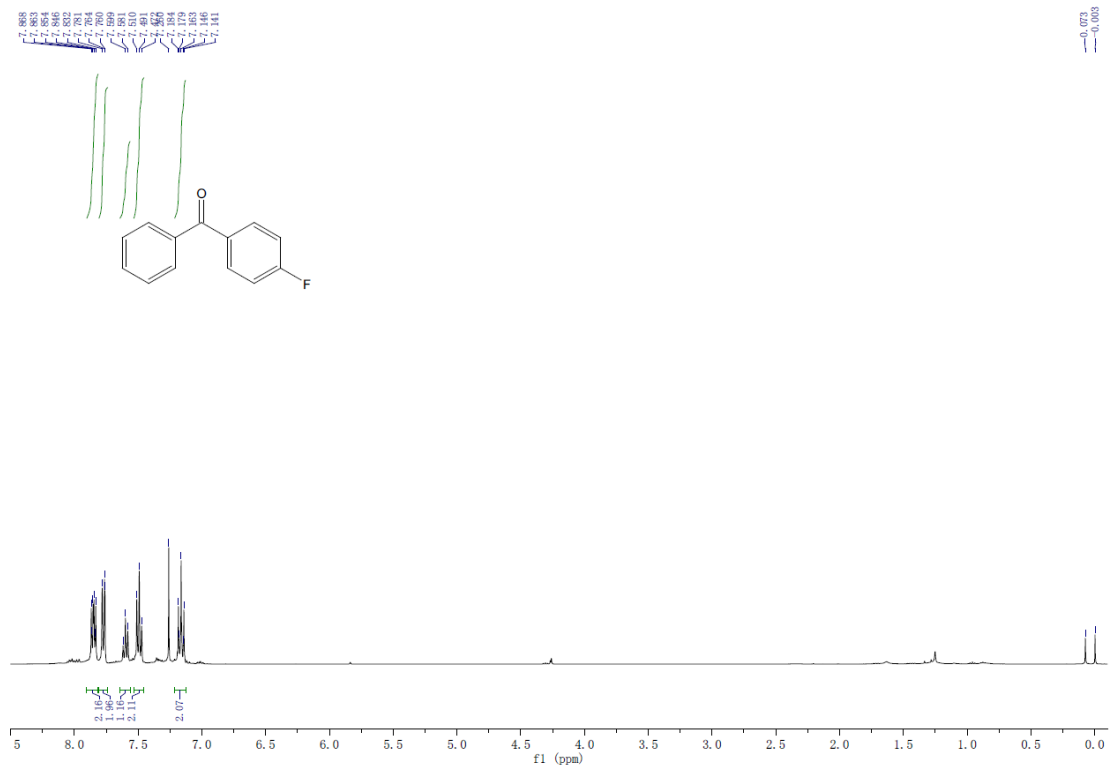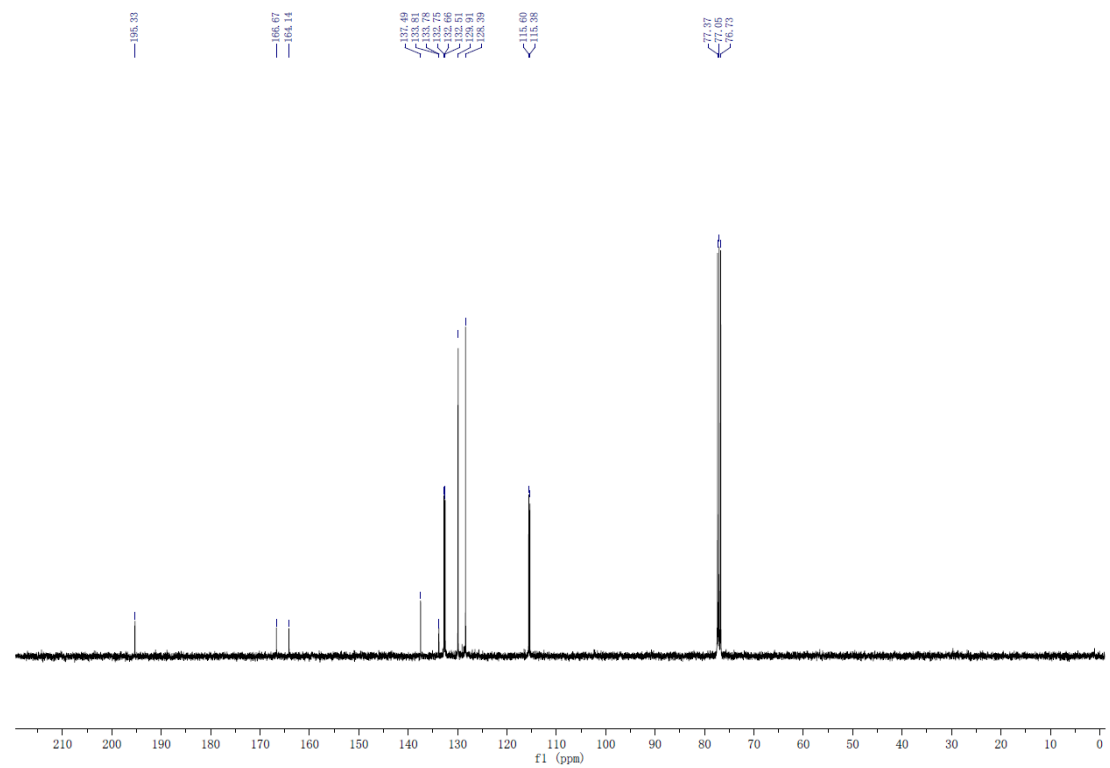

2j

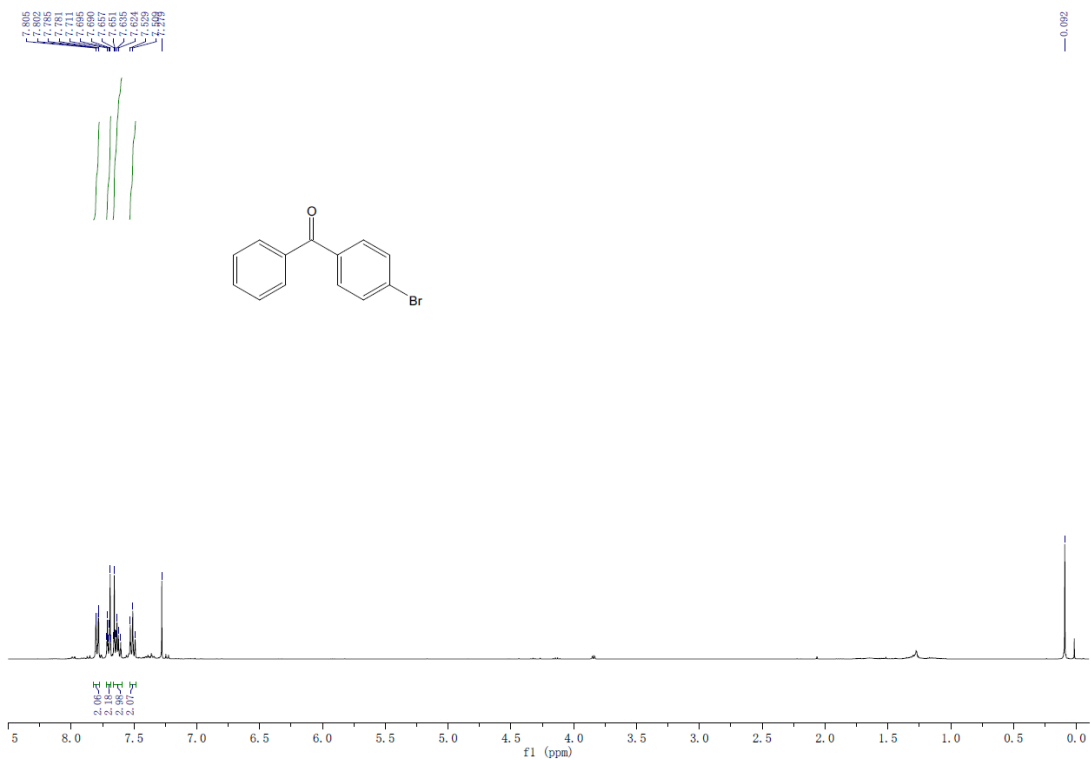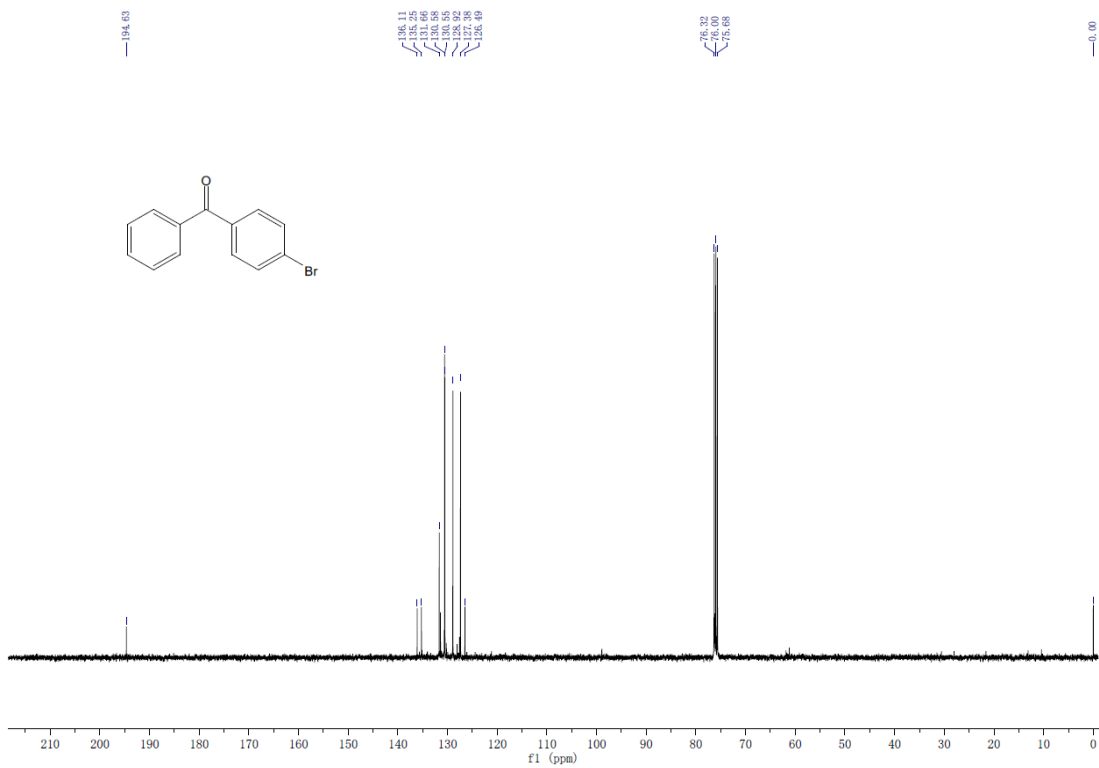

2k

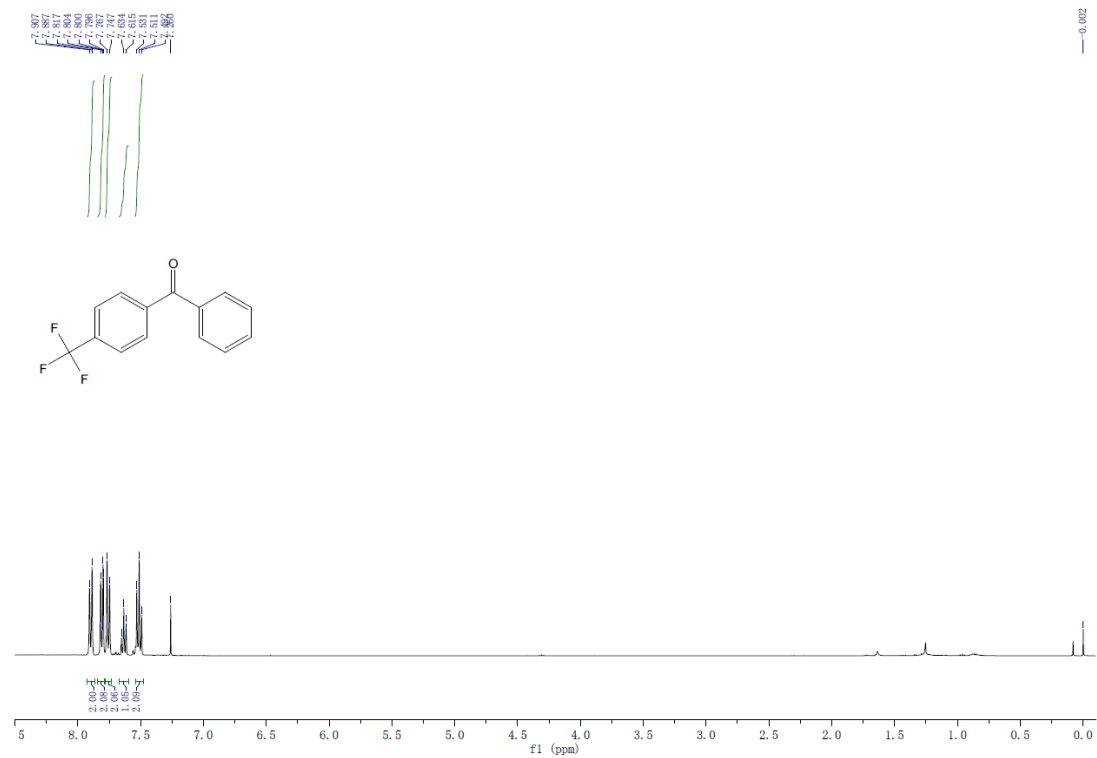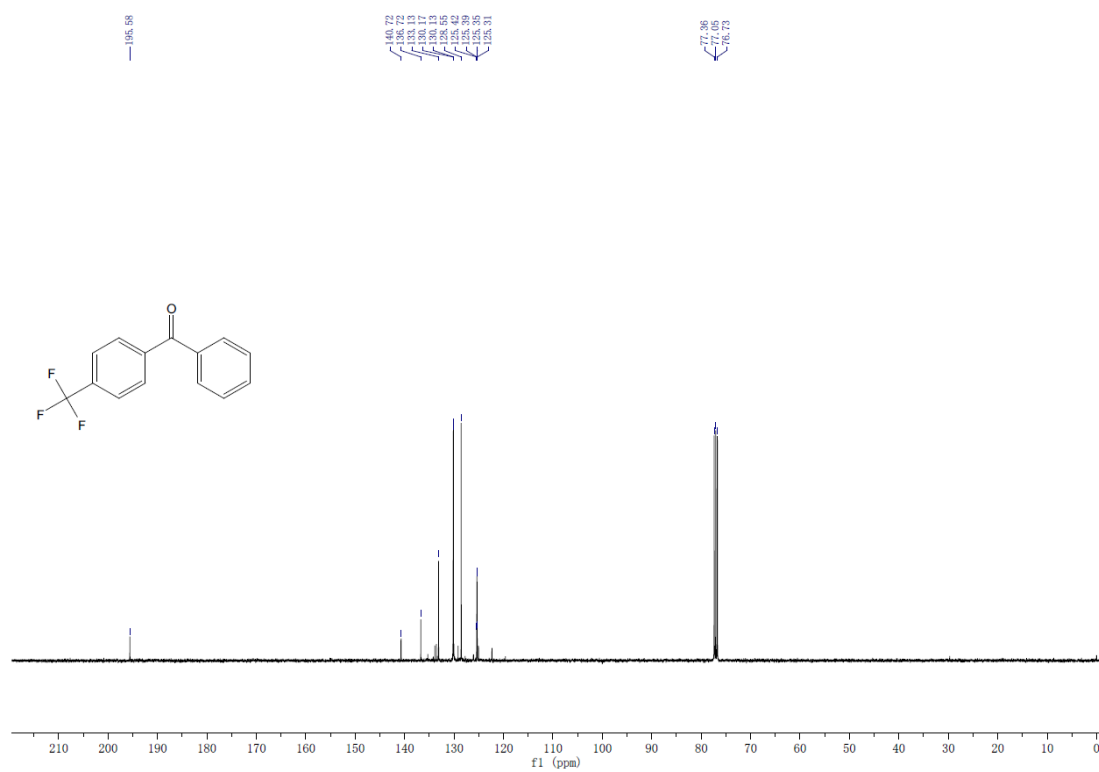

21

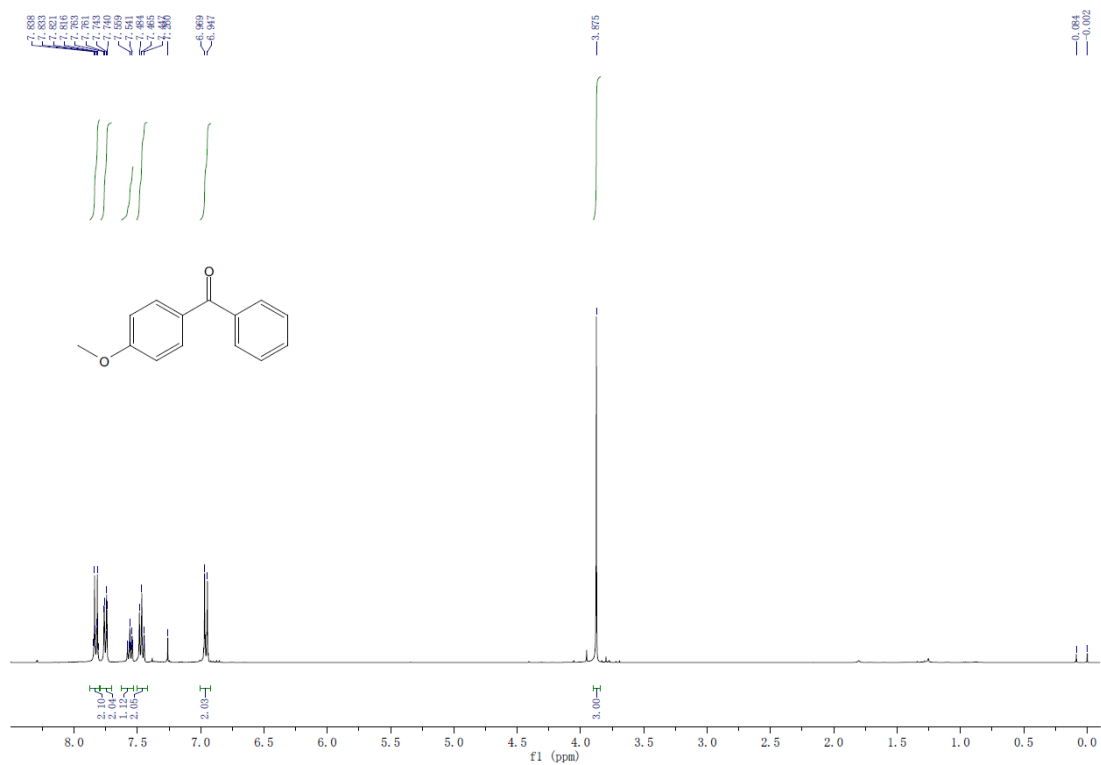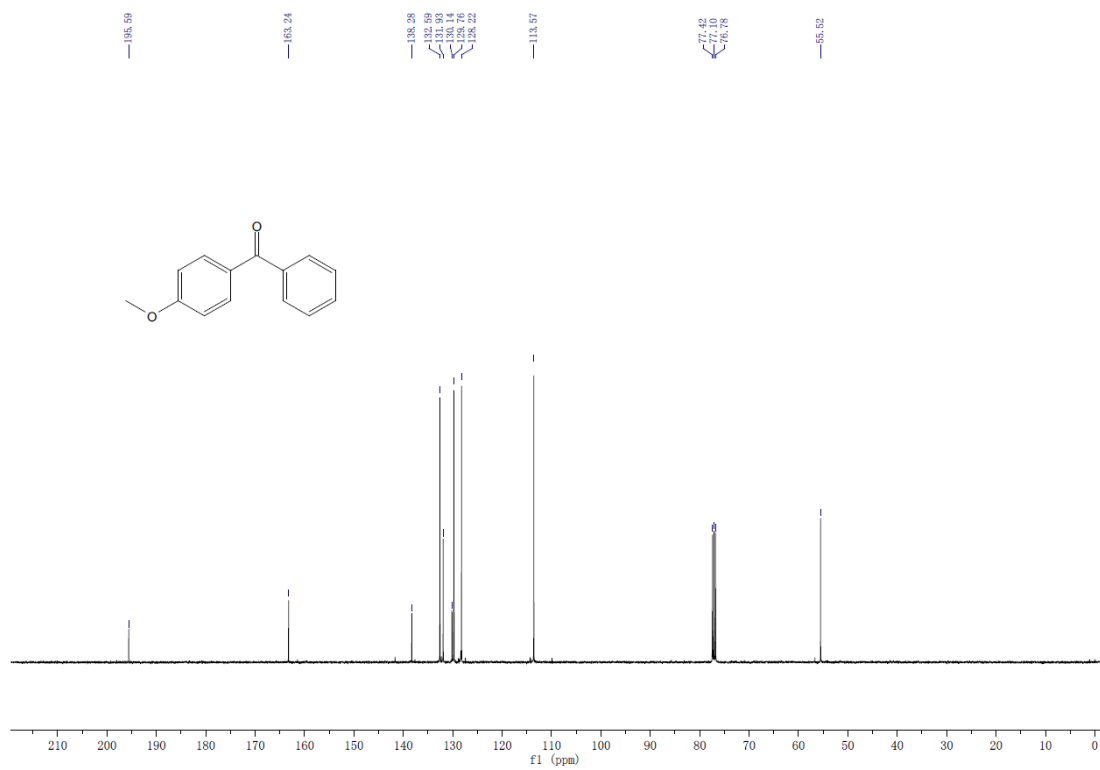

2m

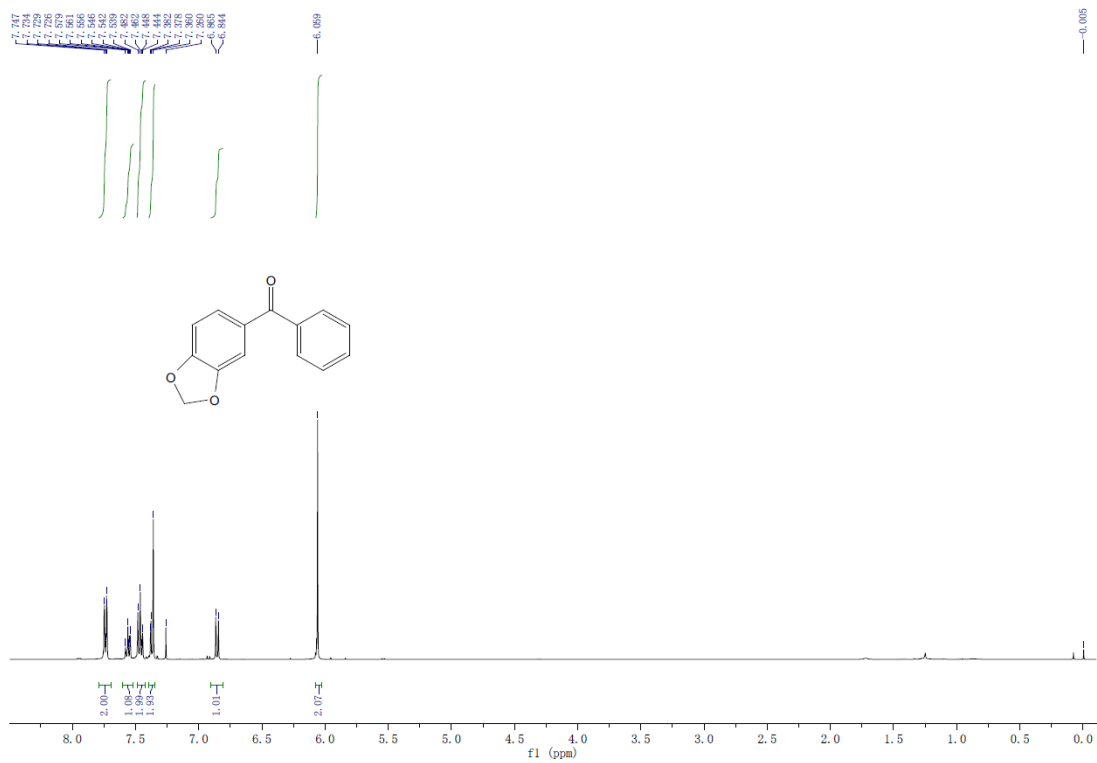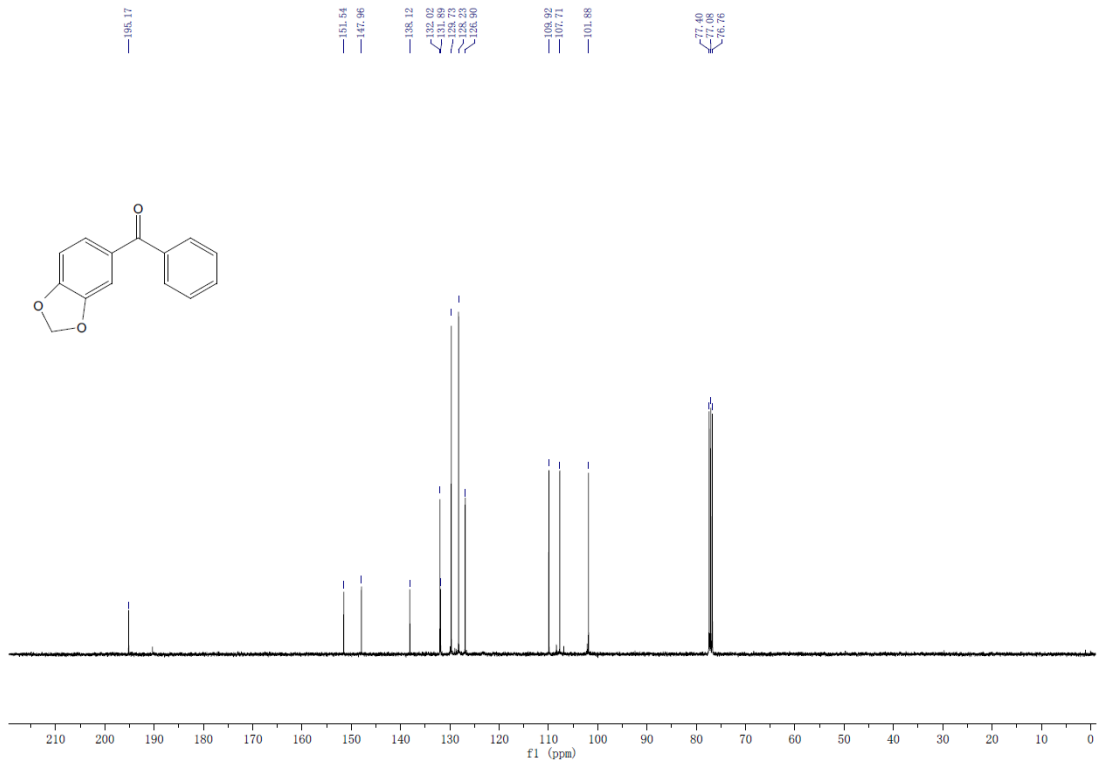

2n

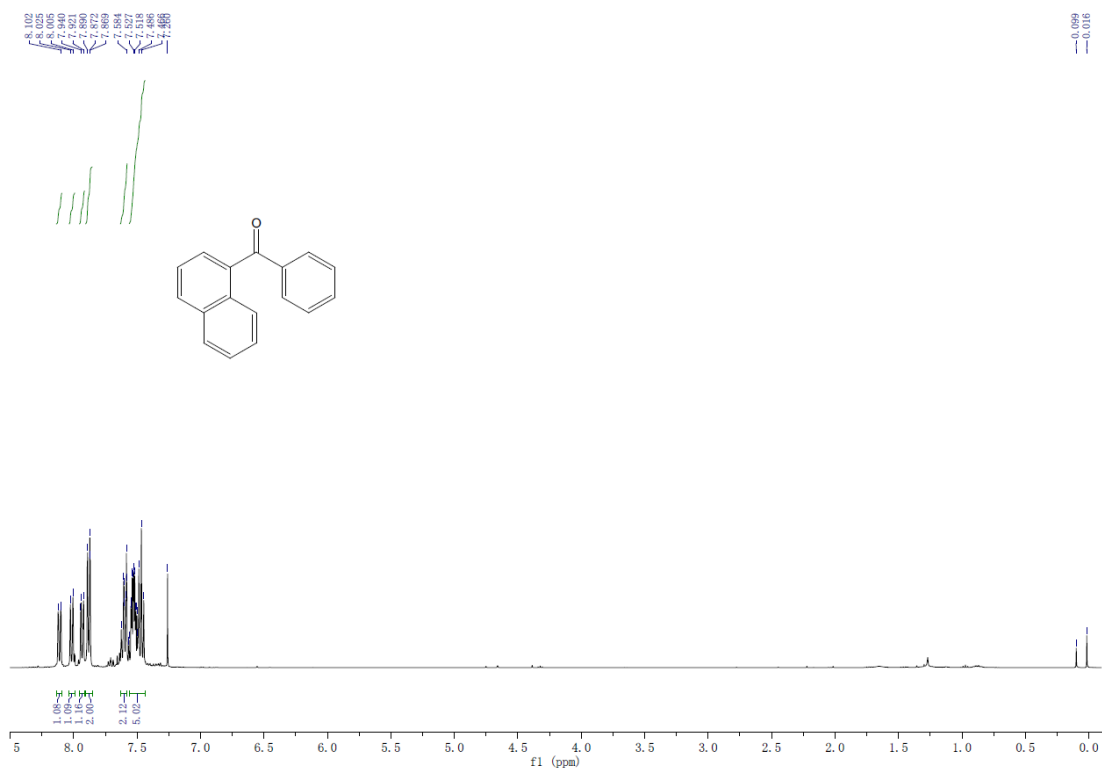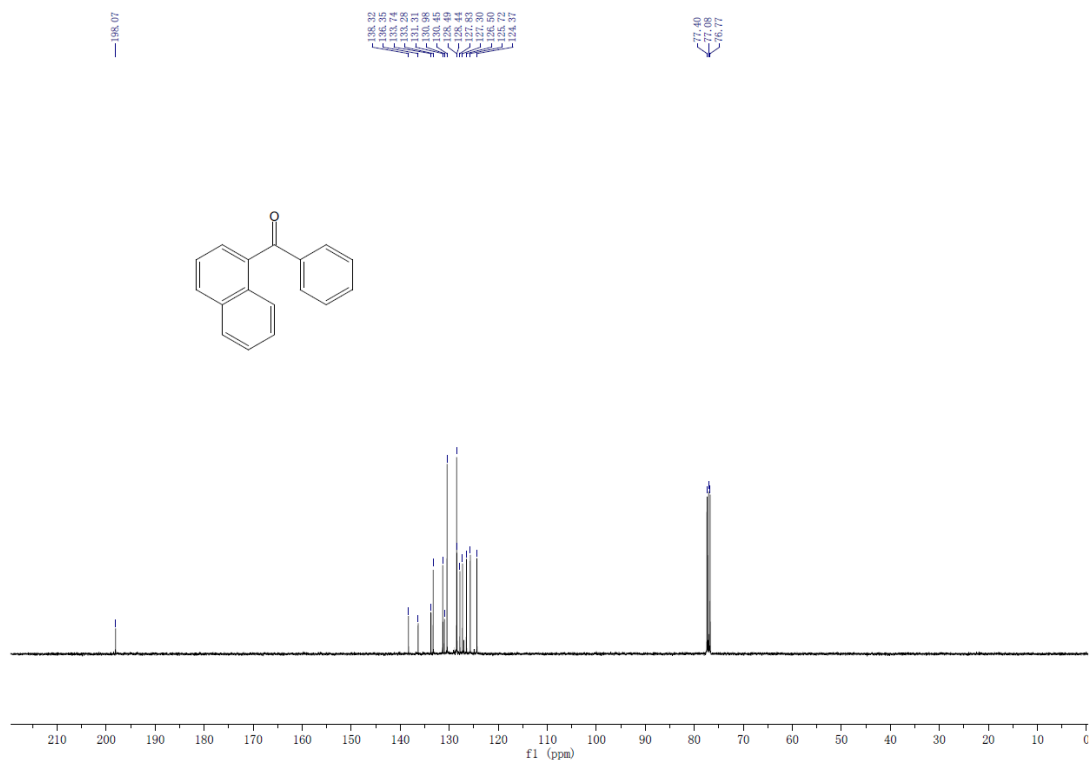





2p

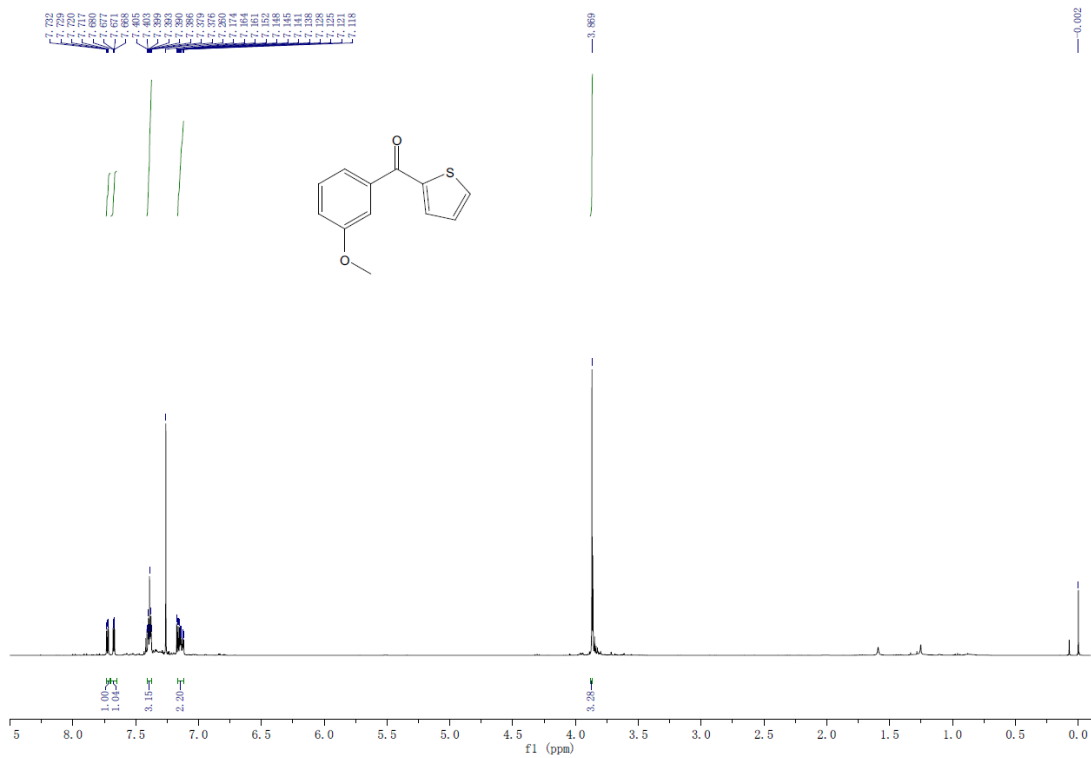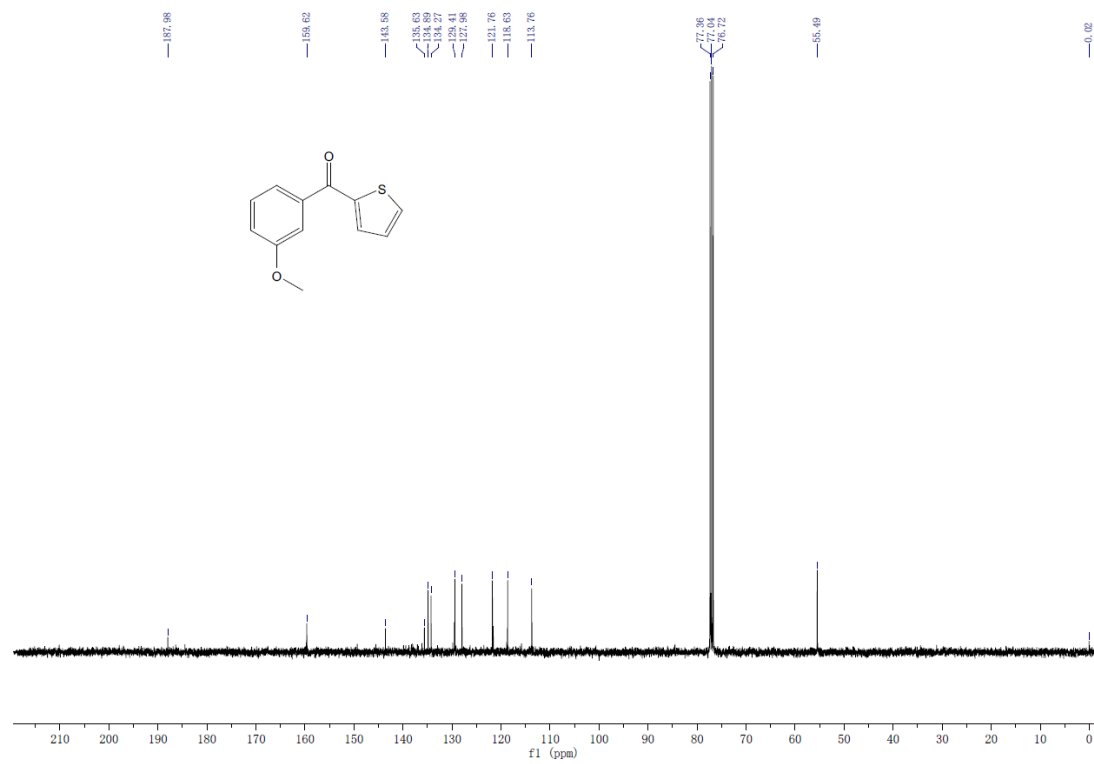

2q

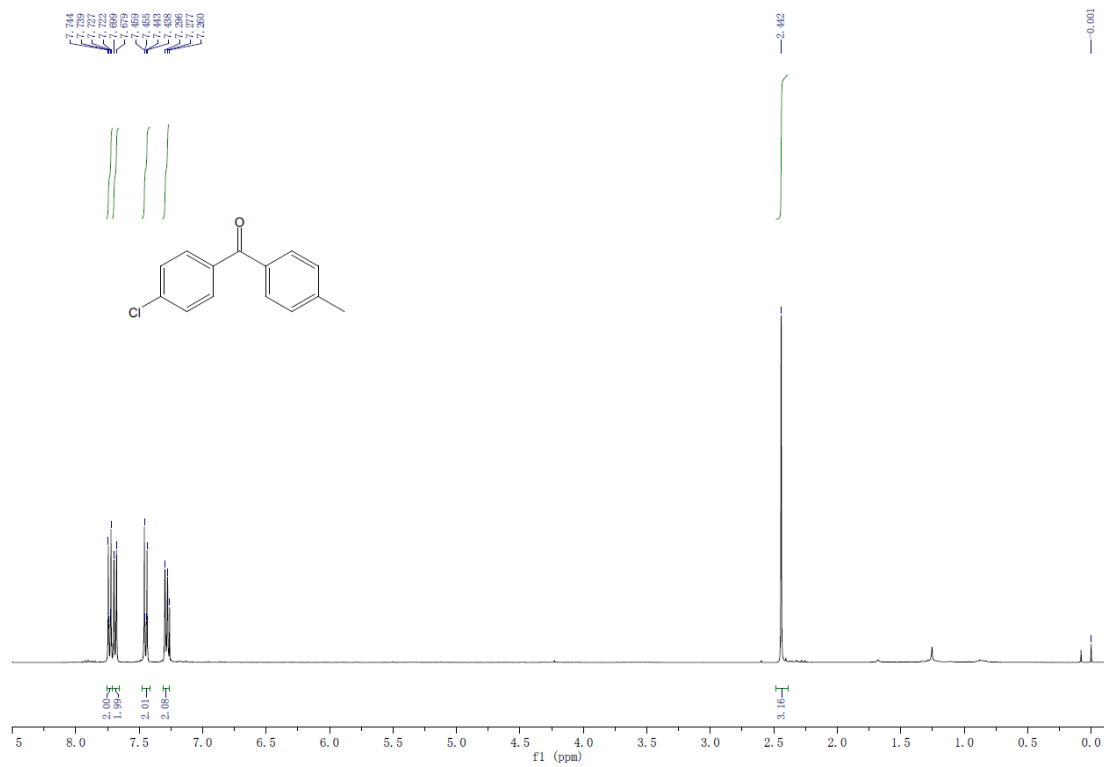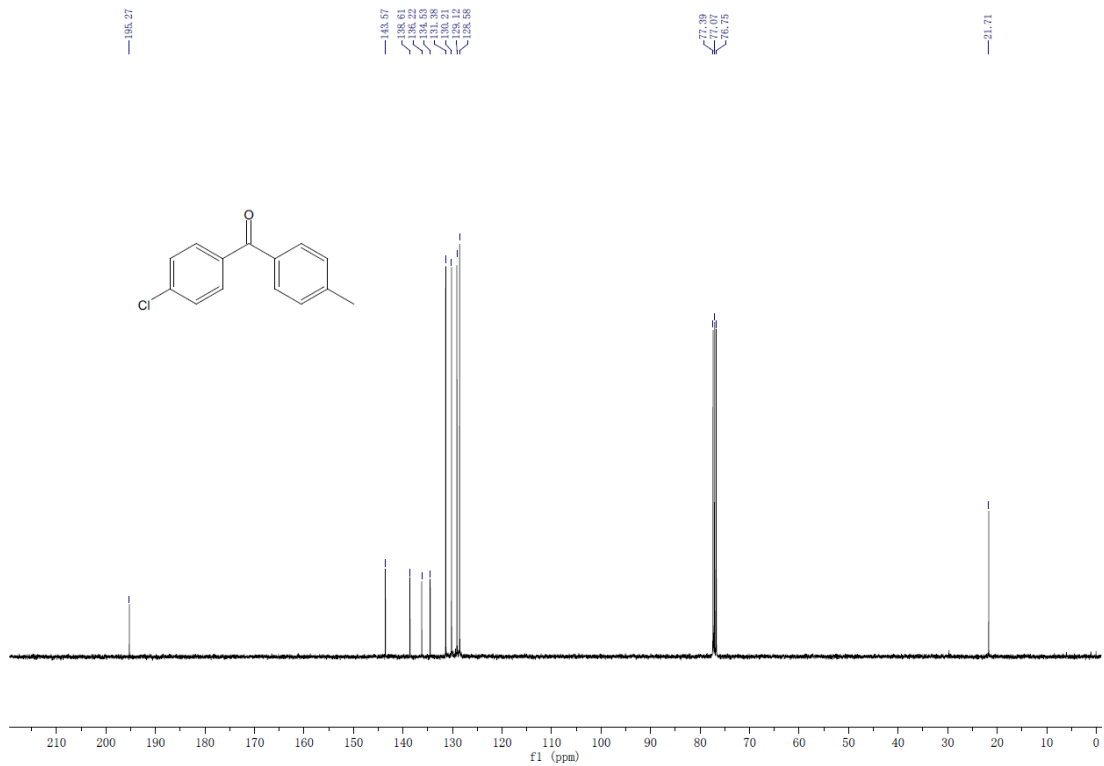

2r

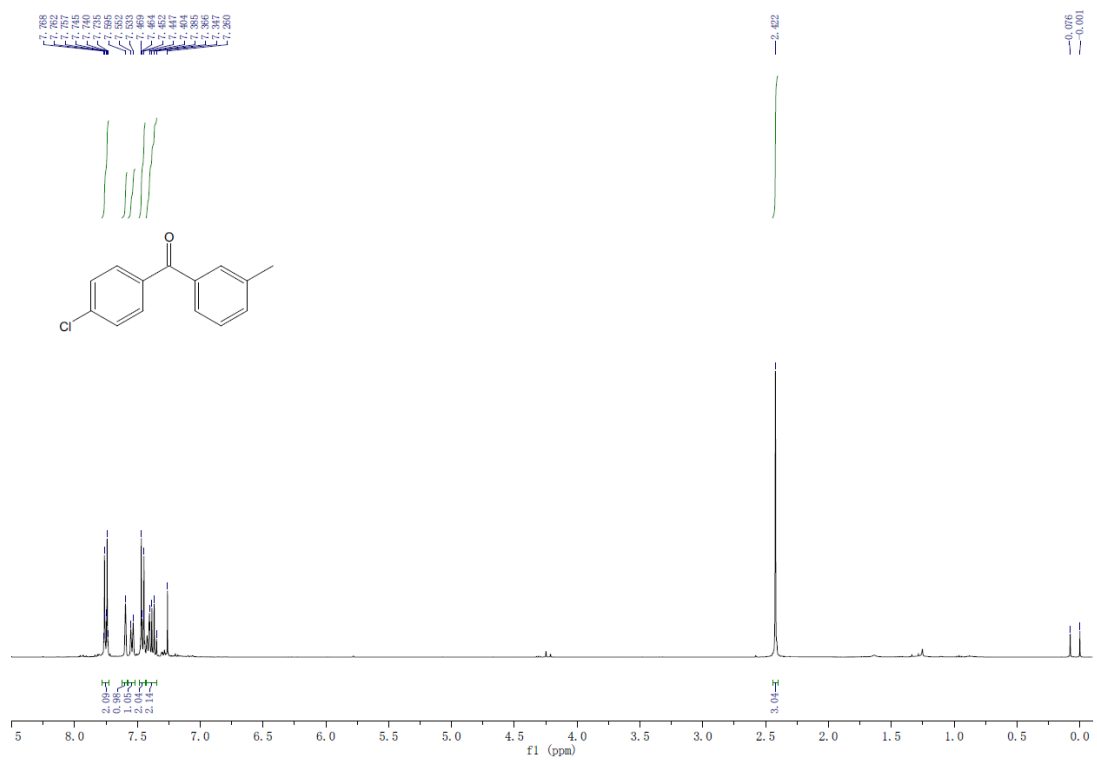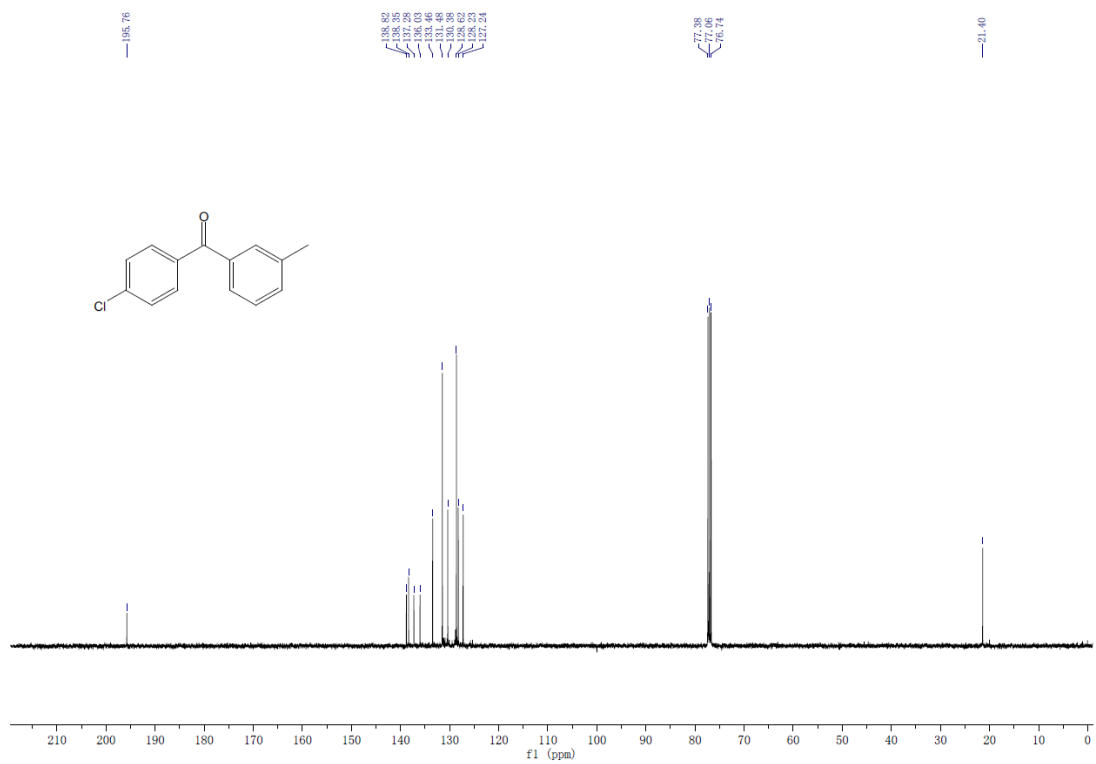

2s

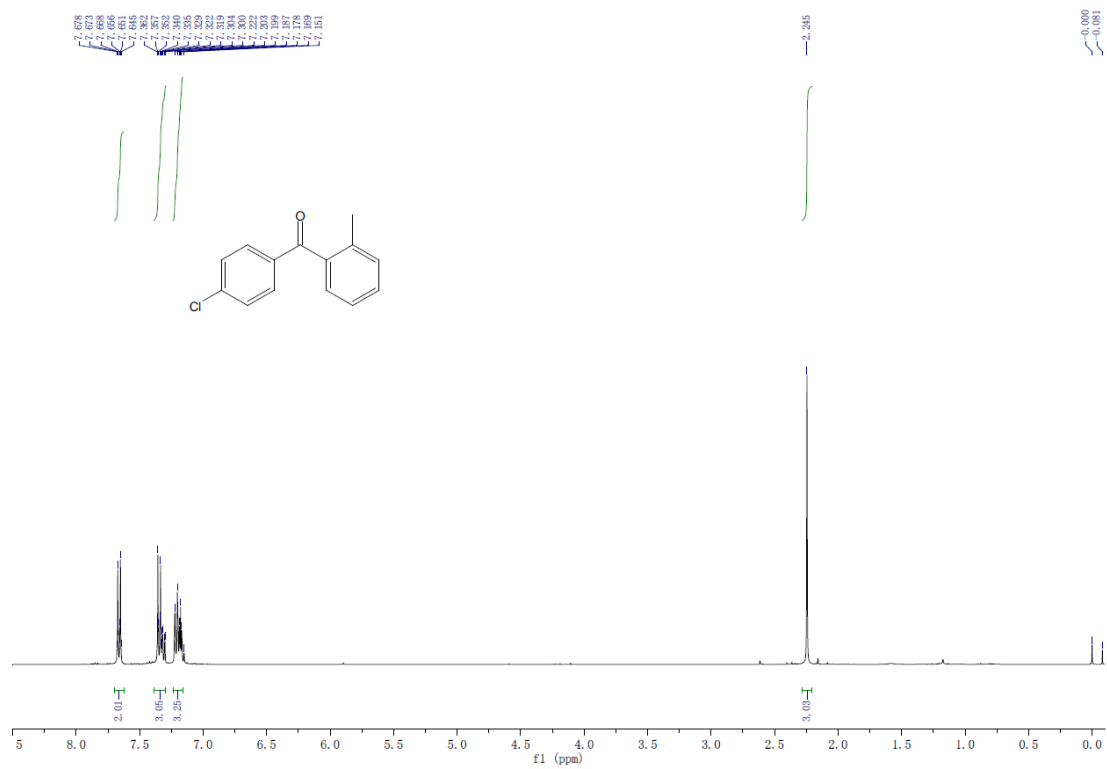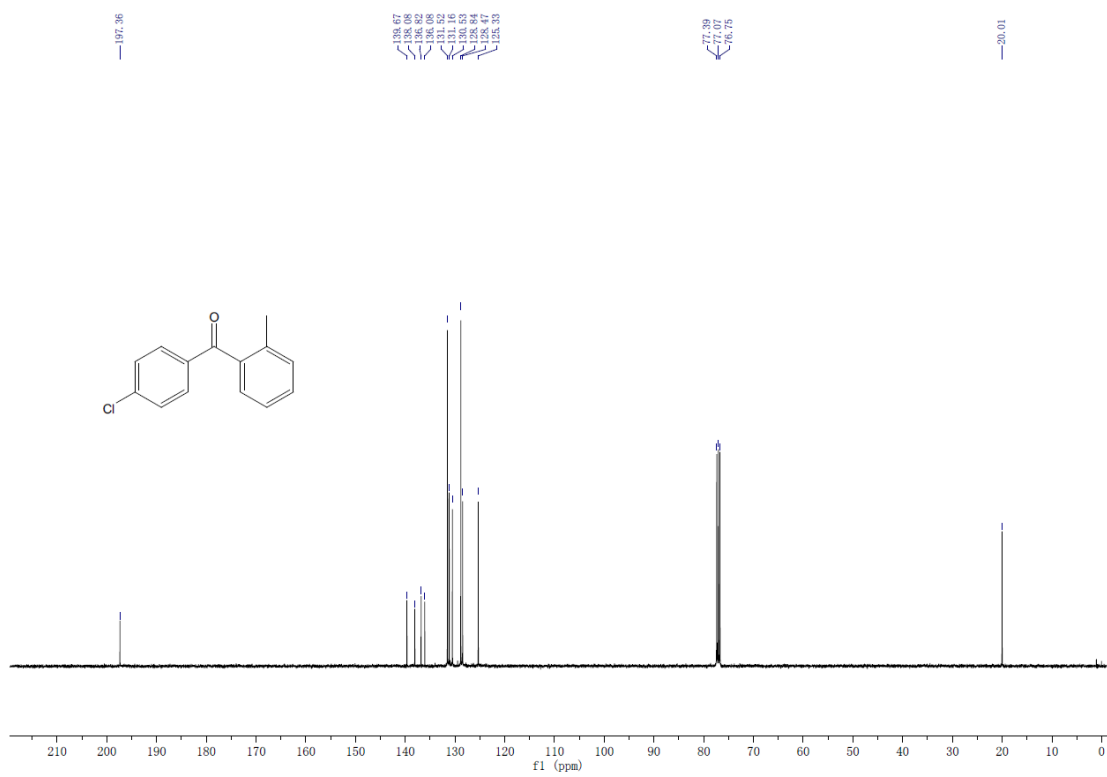

2t

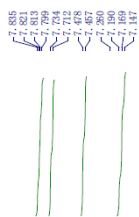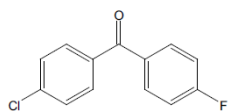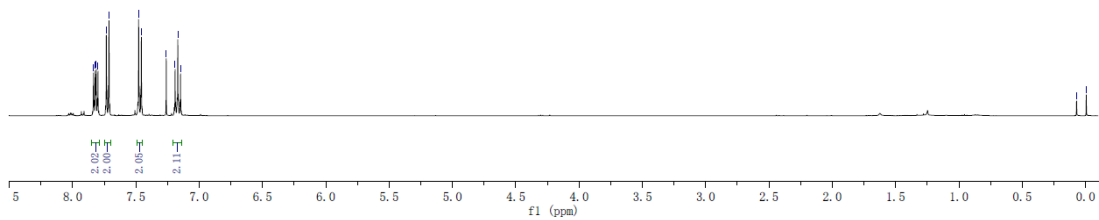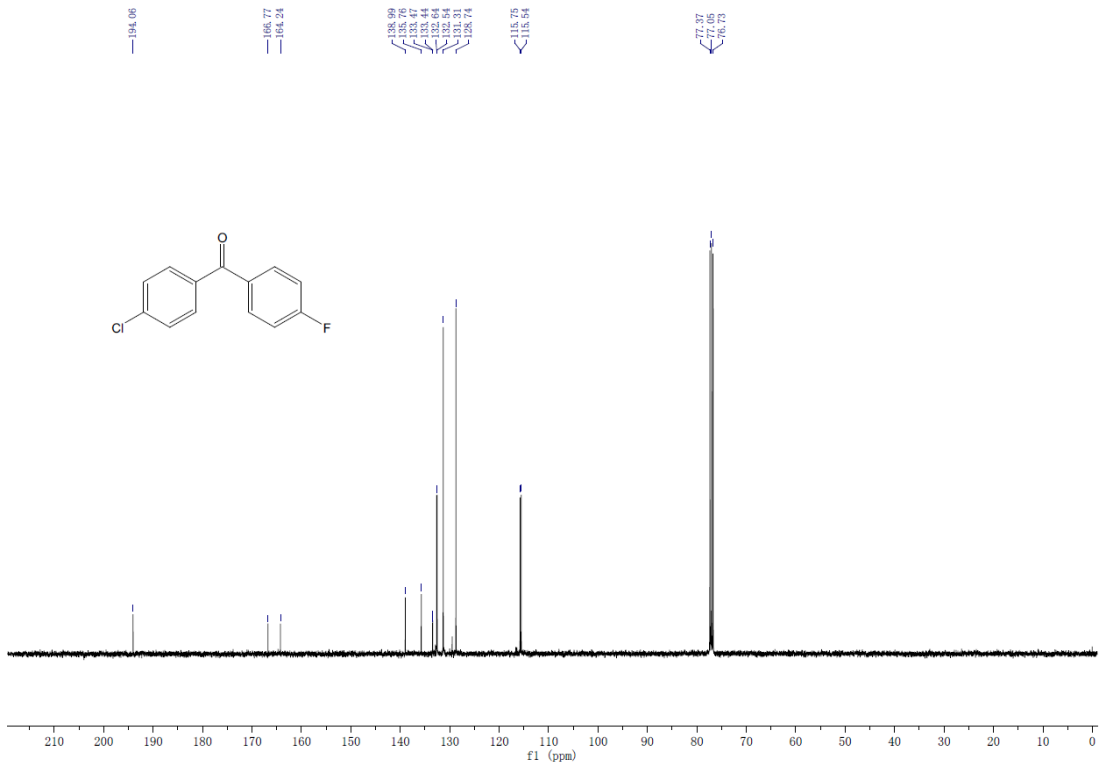

2u

7.755  
7.750  
7.748  
7.746  
7.738  
7.734  
7.643  
7.640  
7.627  
7.624  
7.585  
7.582  
7.577  
7.565  
7.562  
7.496  
7.490  
7.473  
7.469  
7.435  
7.415  
7.280

0.071

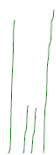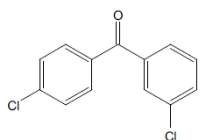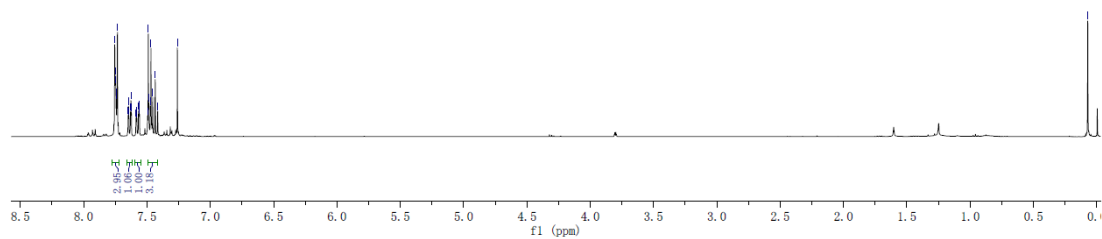

193.01

138.96  
134.16  
133.68  
130.39  
128.76  
127.81  
126.84

76.31  
75.69

0.00

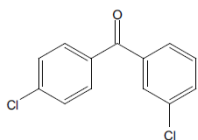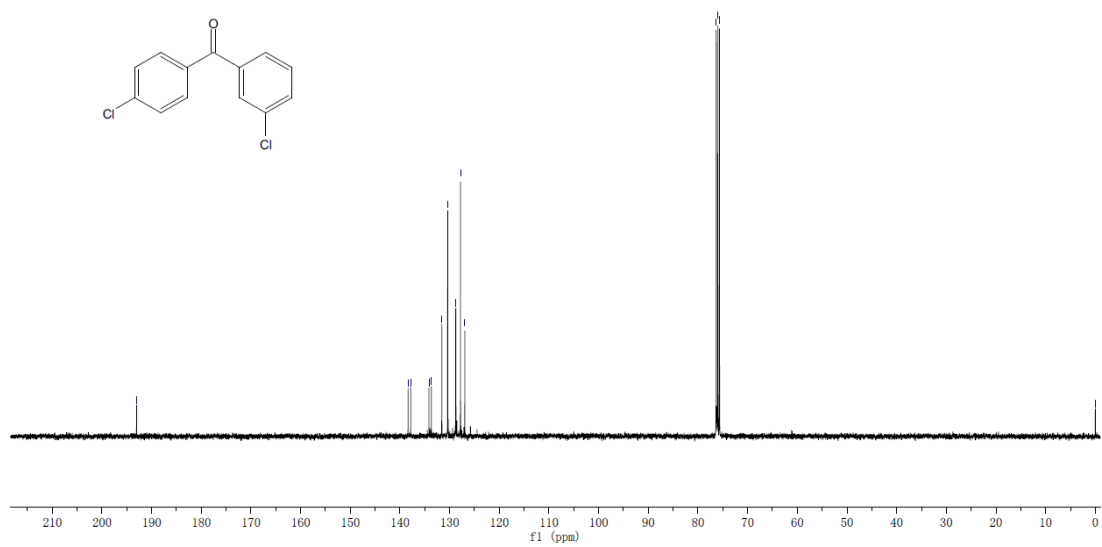

2z

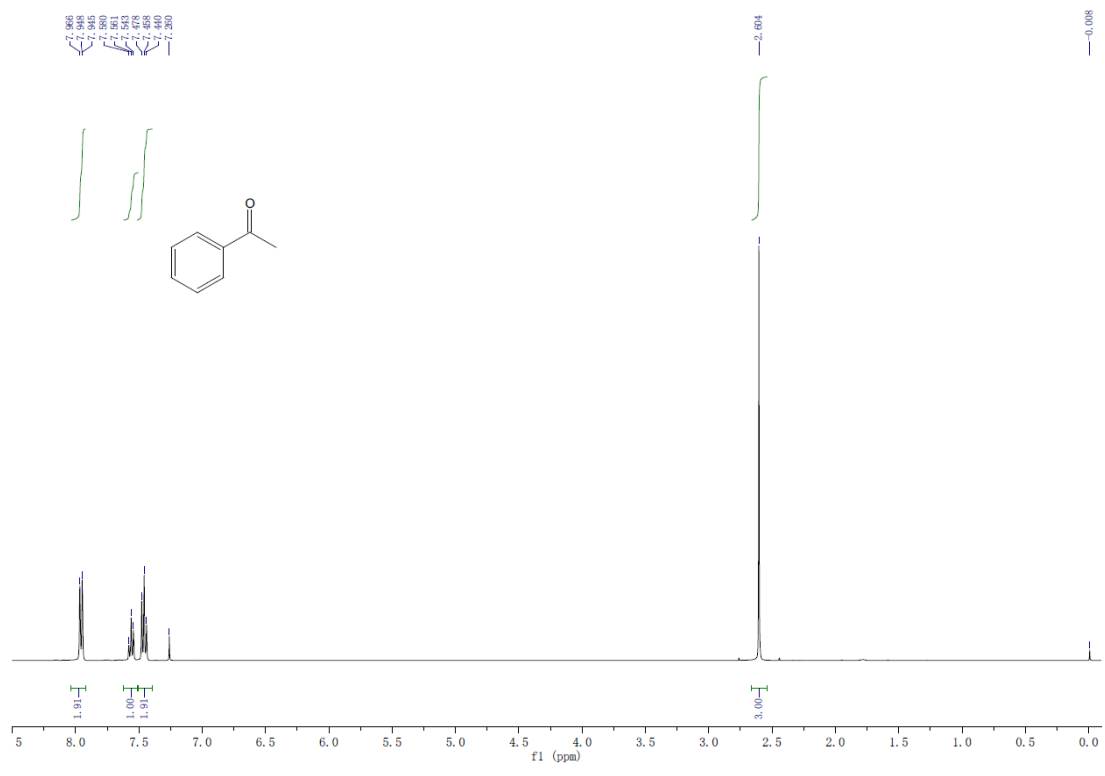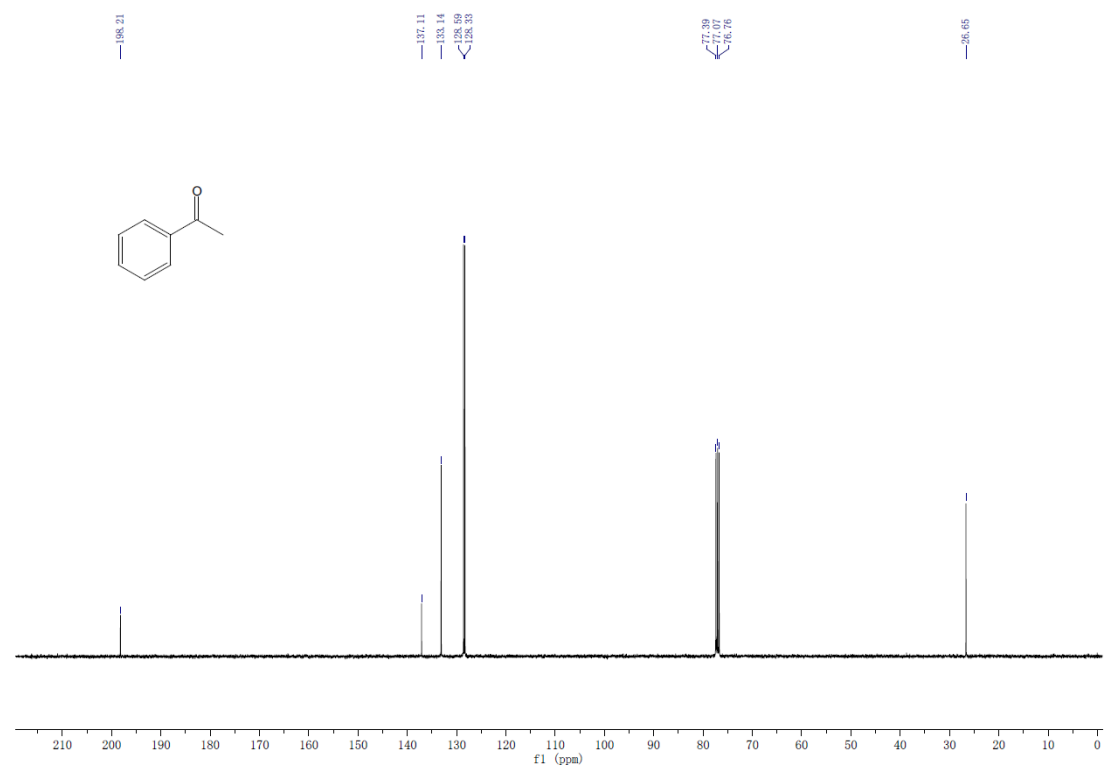

Supplement: c4ra08764j1.pdf [file c4ra08764j1.pdf]
